# Supplementary material for: Exploring Genomics and Microbial Ecology: Analysis of Bidens pilosa L. Genetic Structure and Soil Microbiome Diversity by RAD-Seq and Metabarcoding
Source: MDPI journal article supplement (doi:10.3390/plants13020221), 2024-01-13
Supplement: s1 [file s1]

## Venn diagram - Bacteria

A

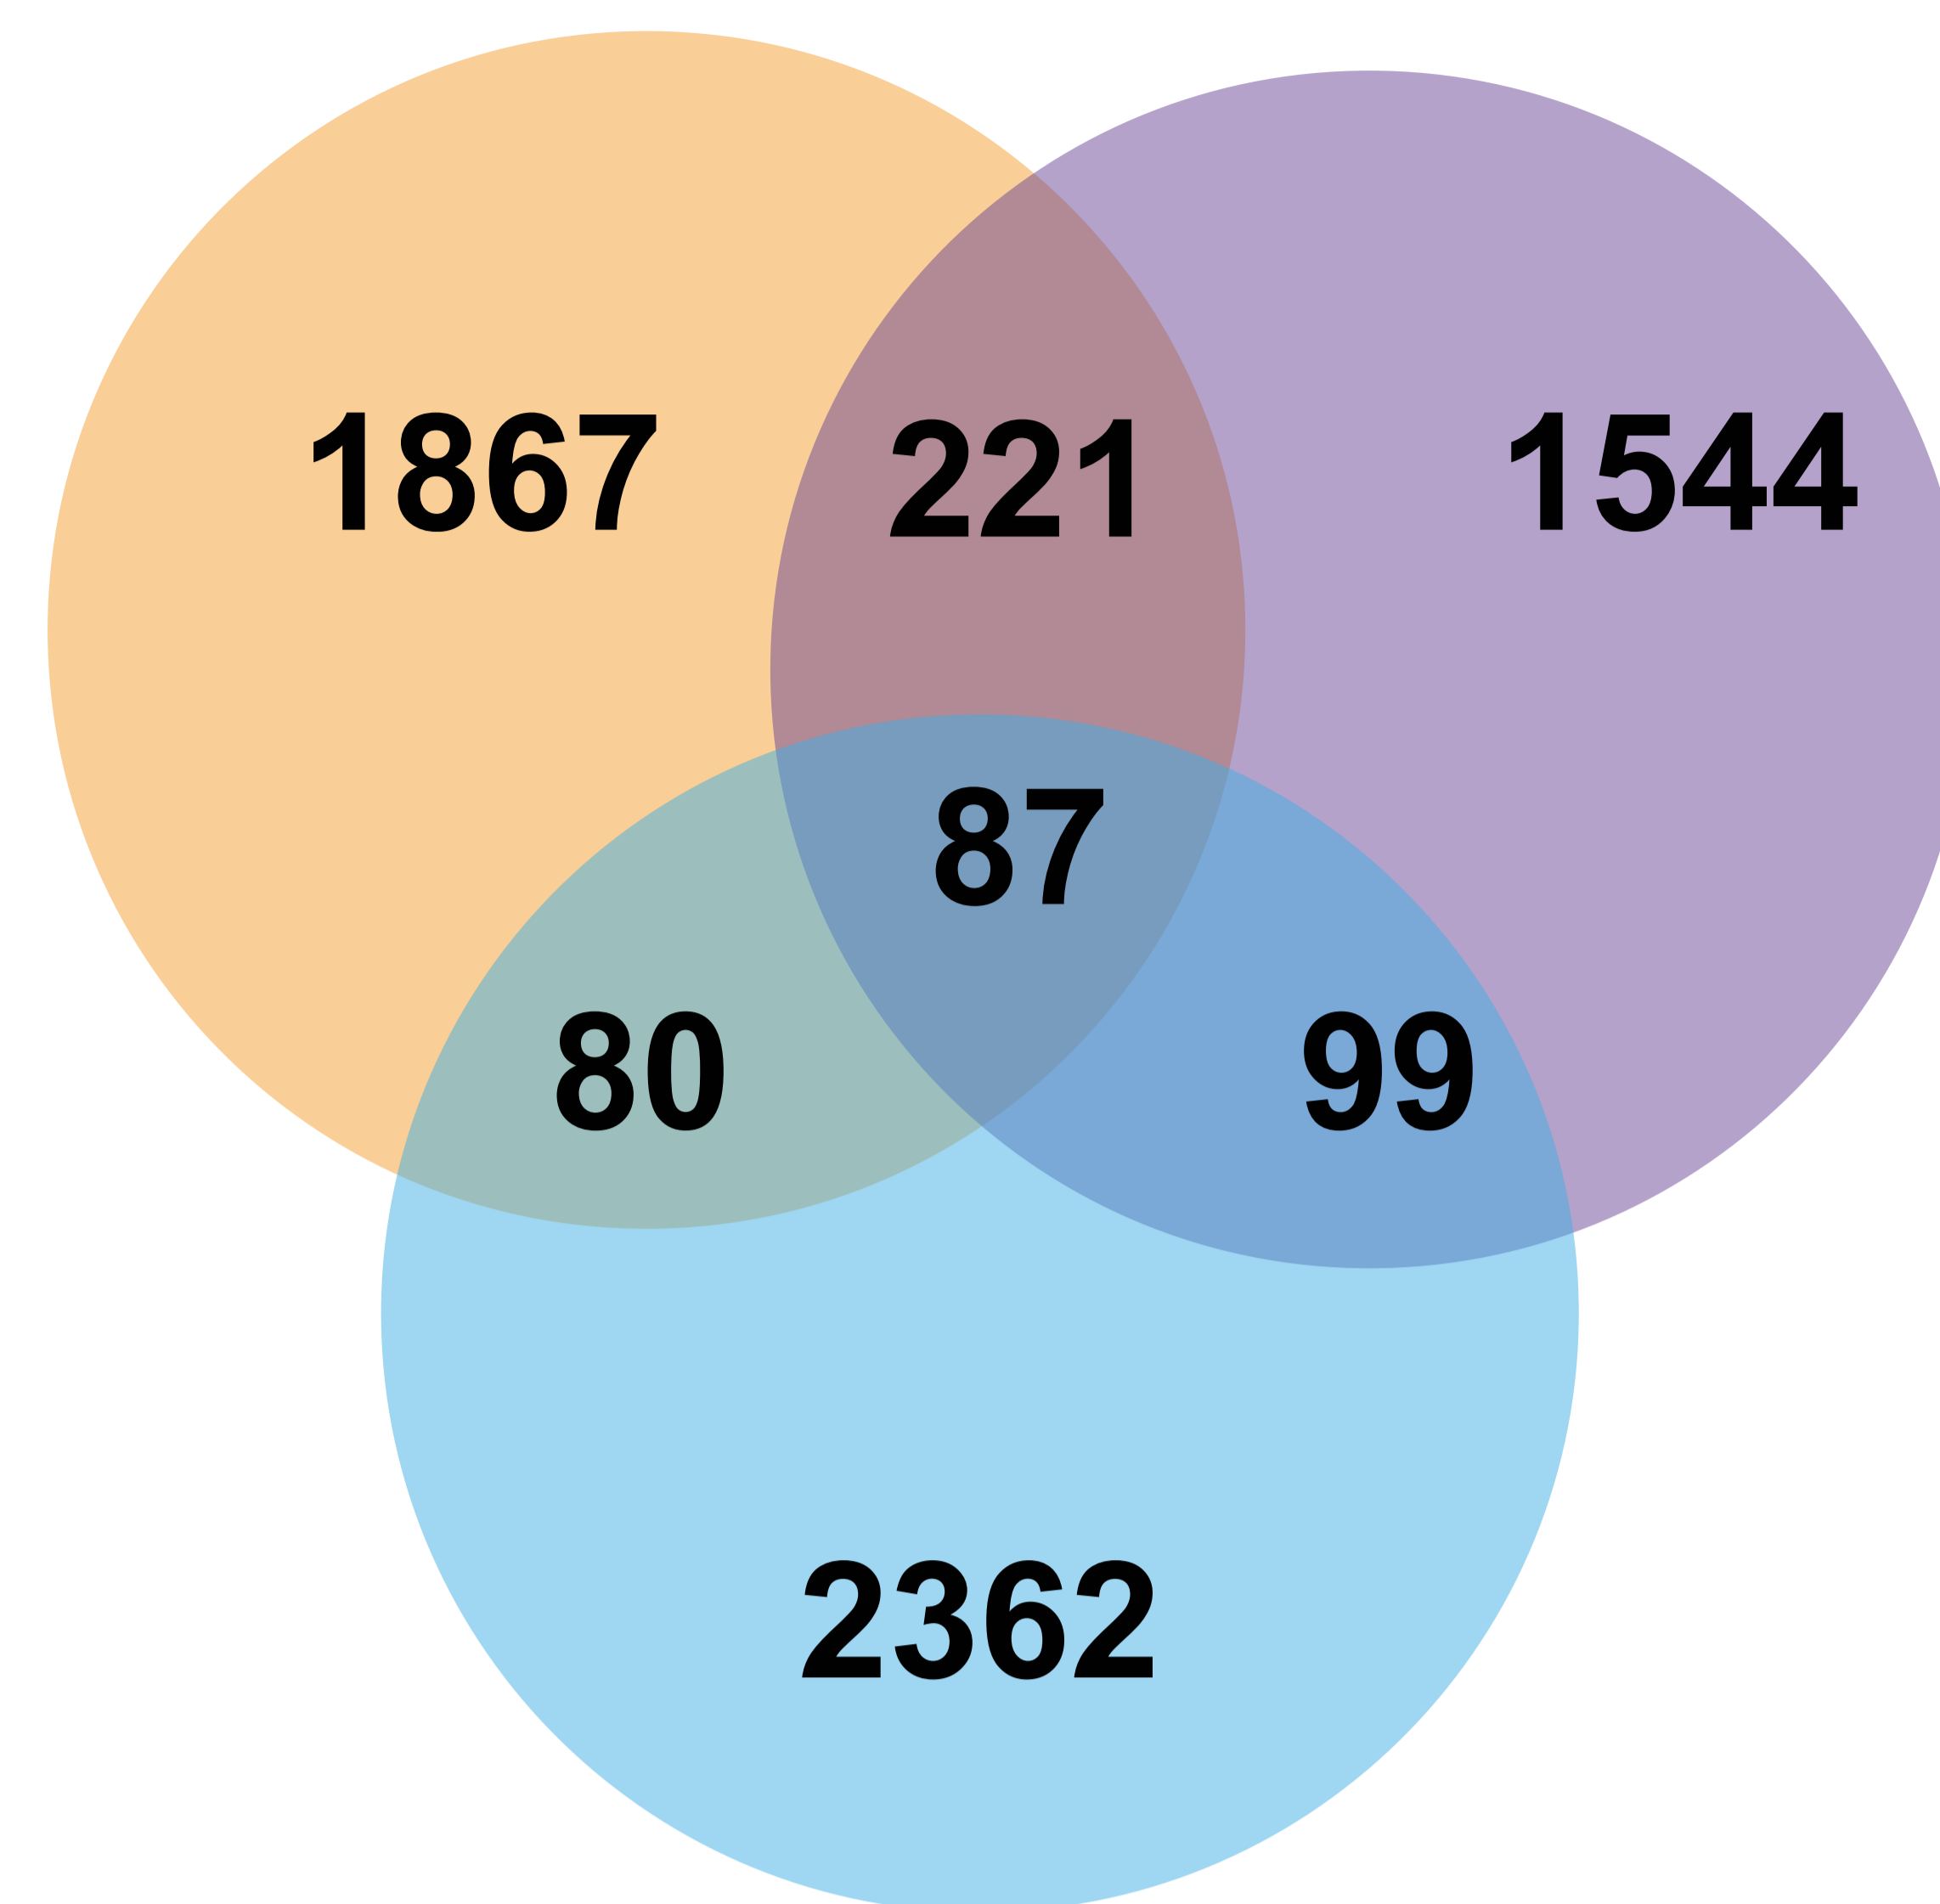

**ASV**  
Total: 6261

B

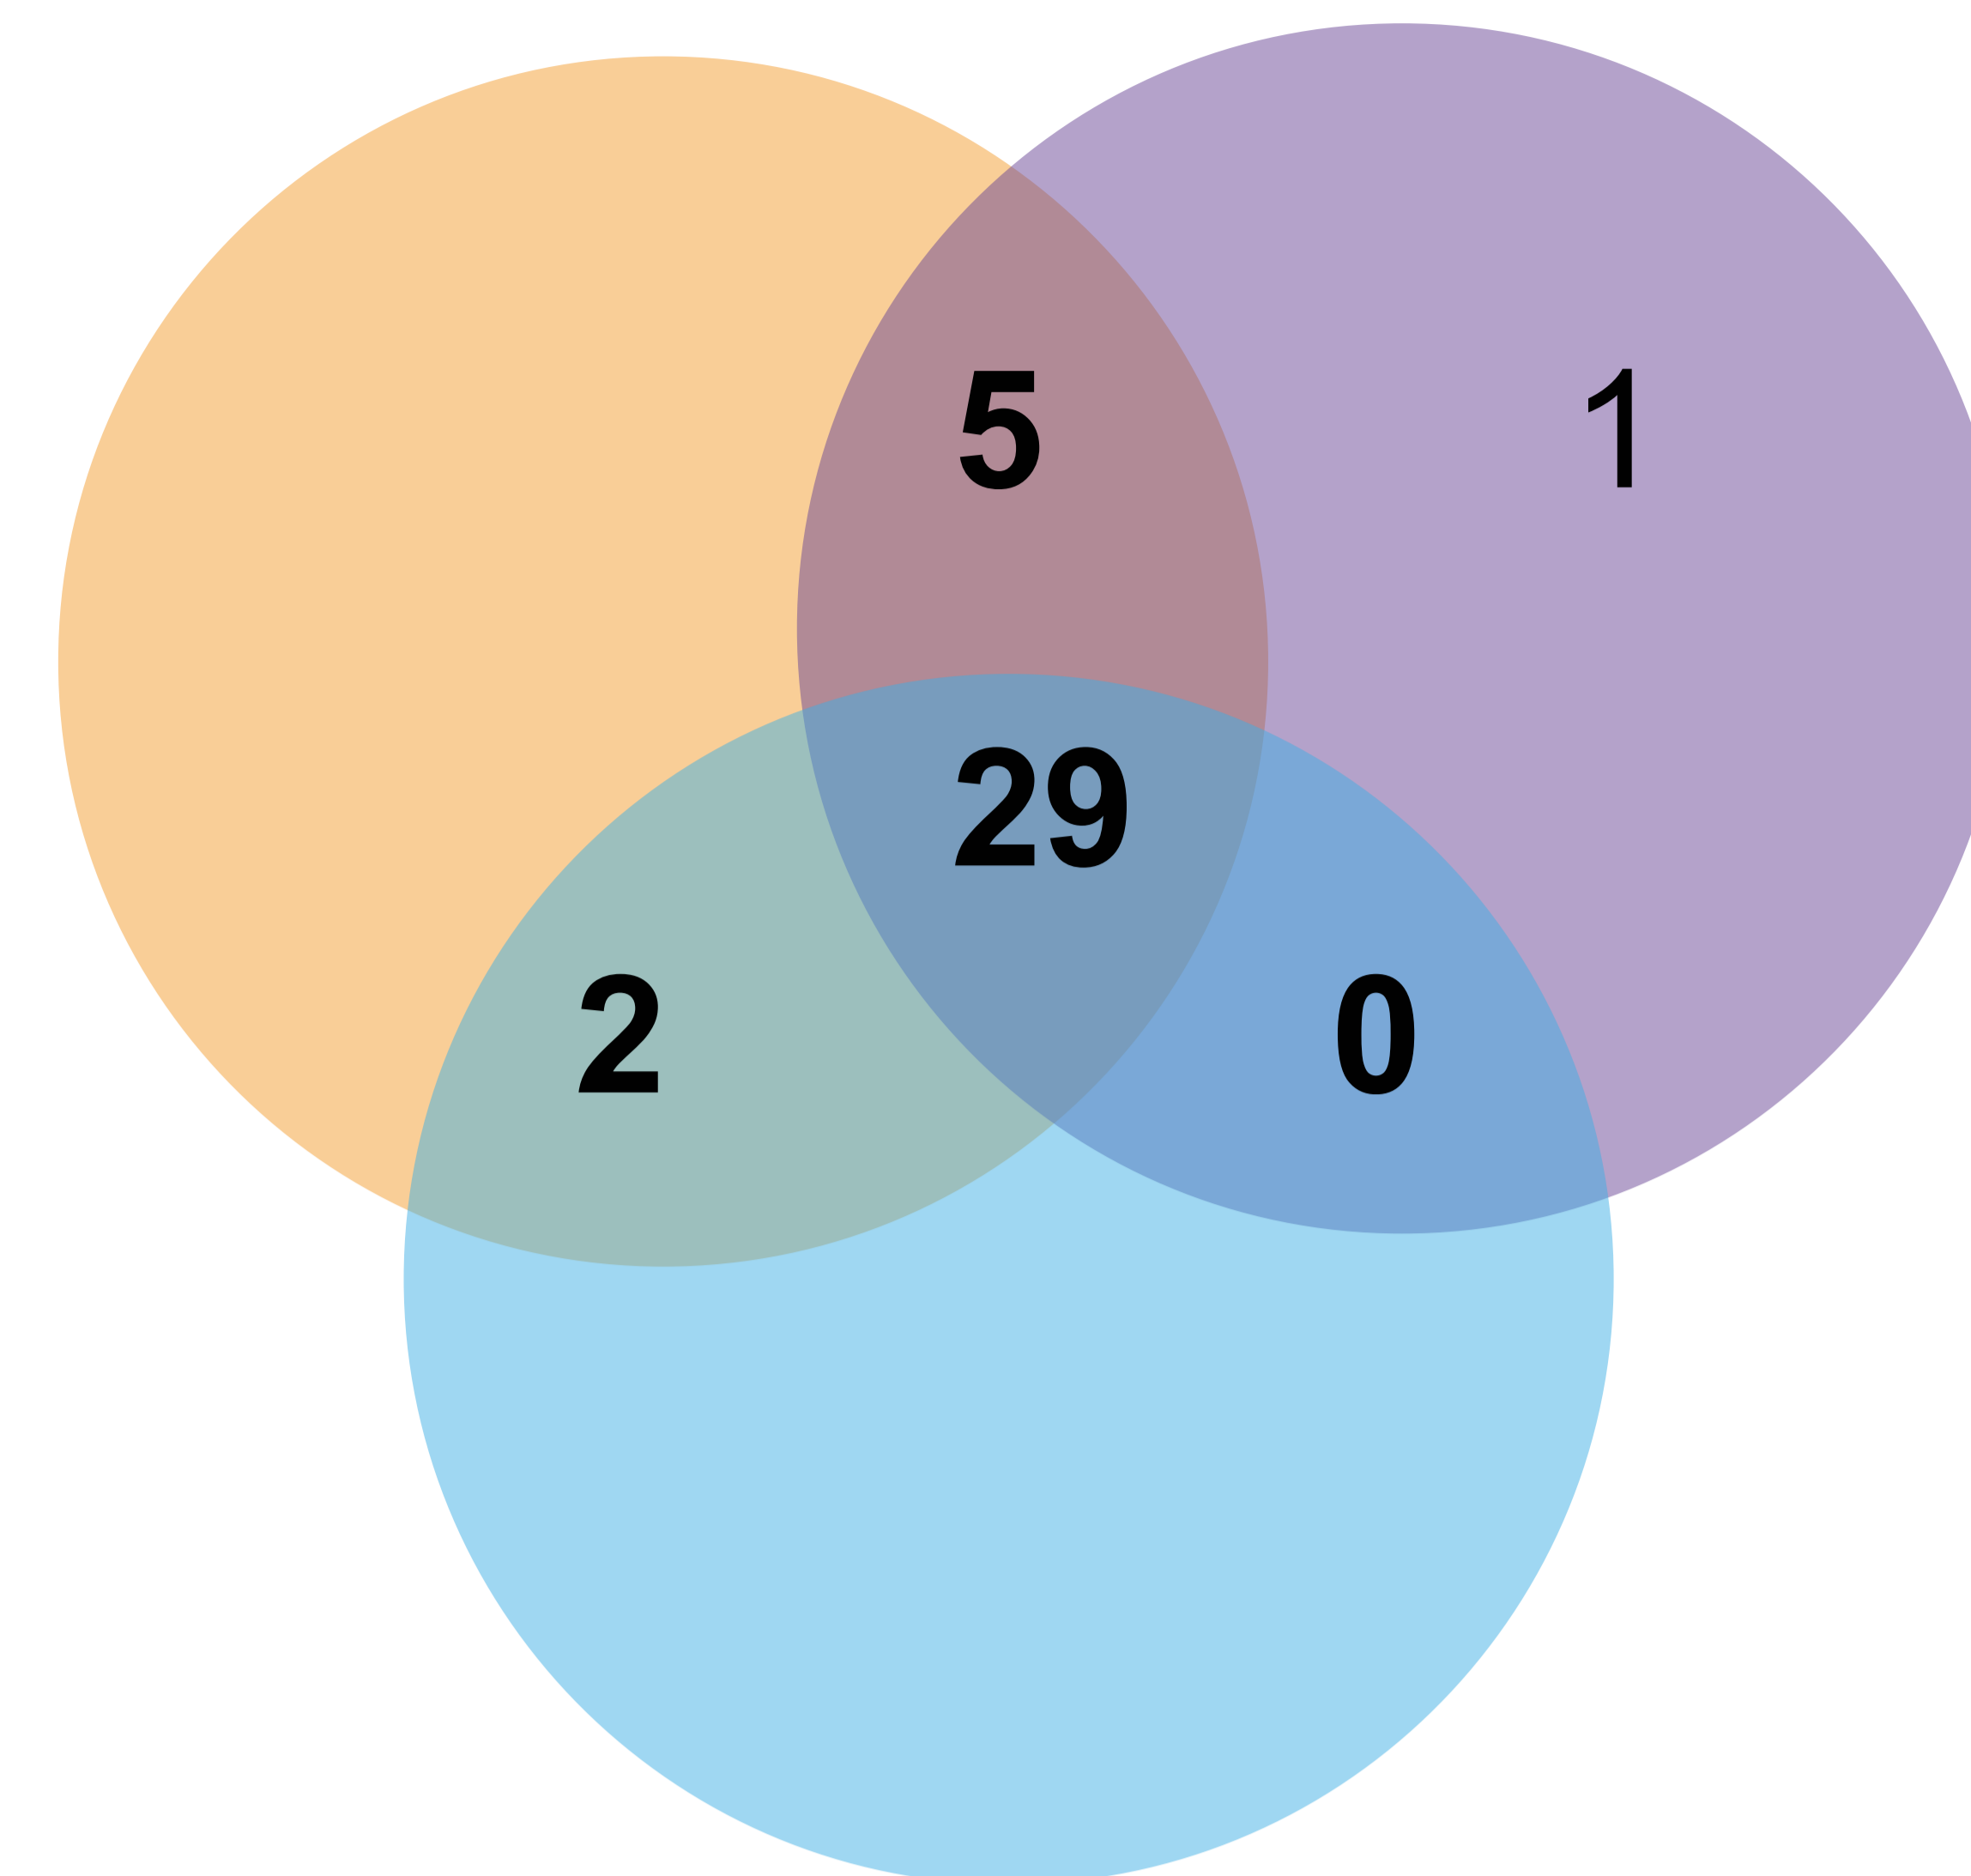

**Phylum**  
Total: 32  
Asignation: 100%

C

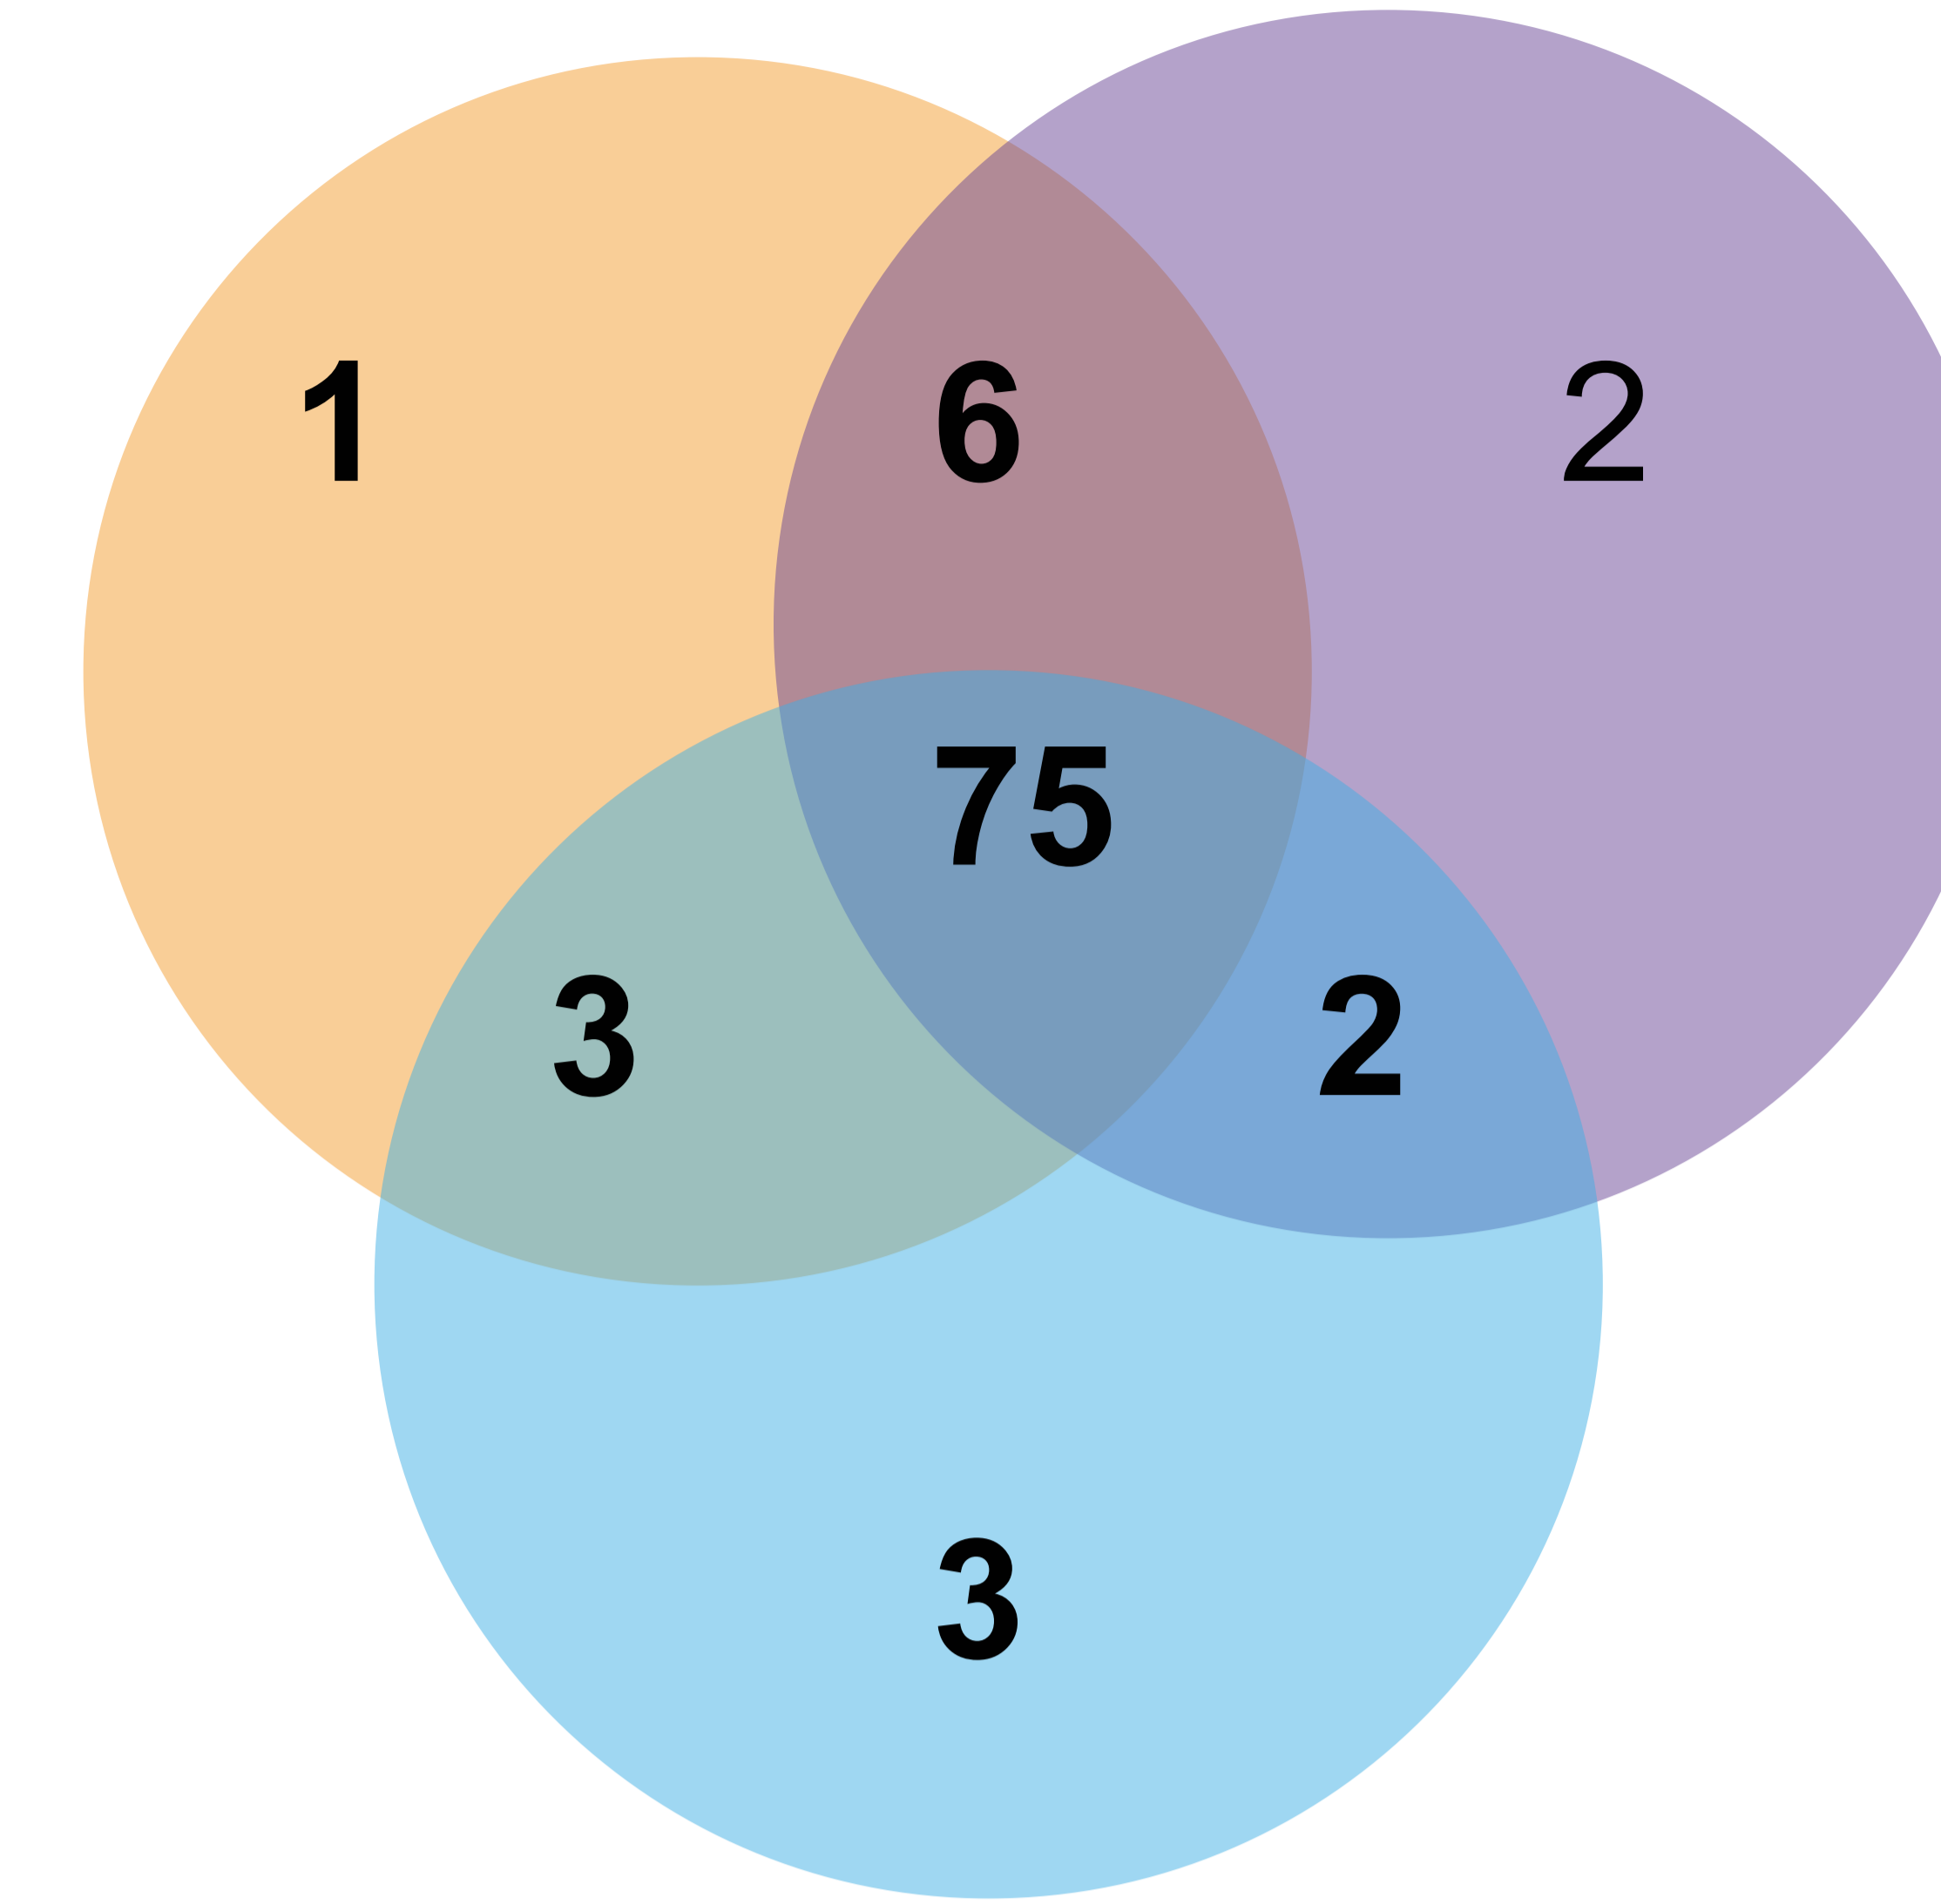

**Class**  
Total: 92  
Asignation: 99%

D

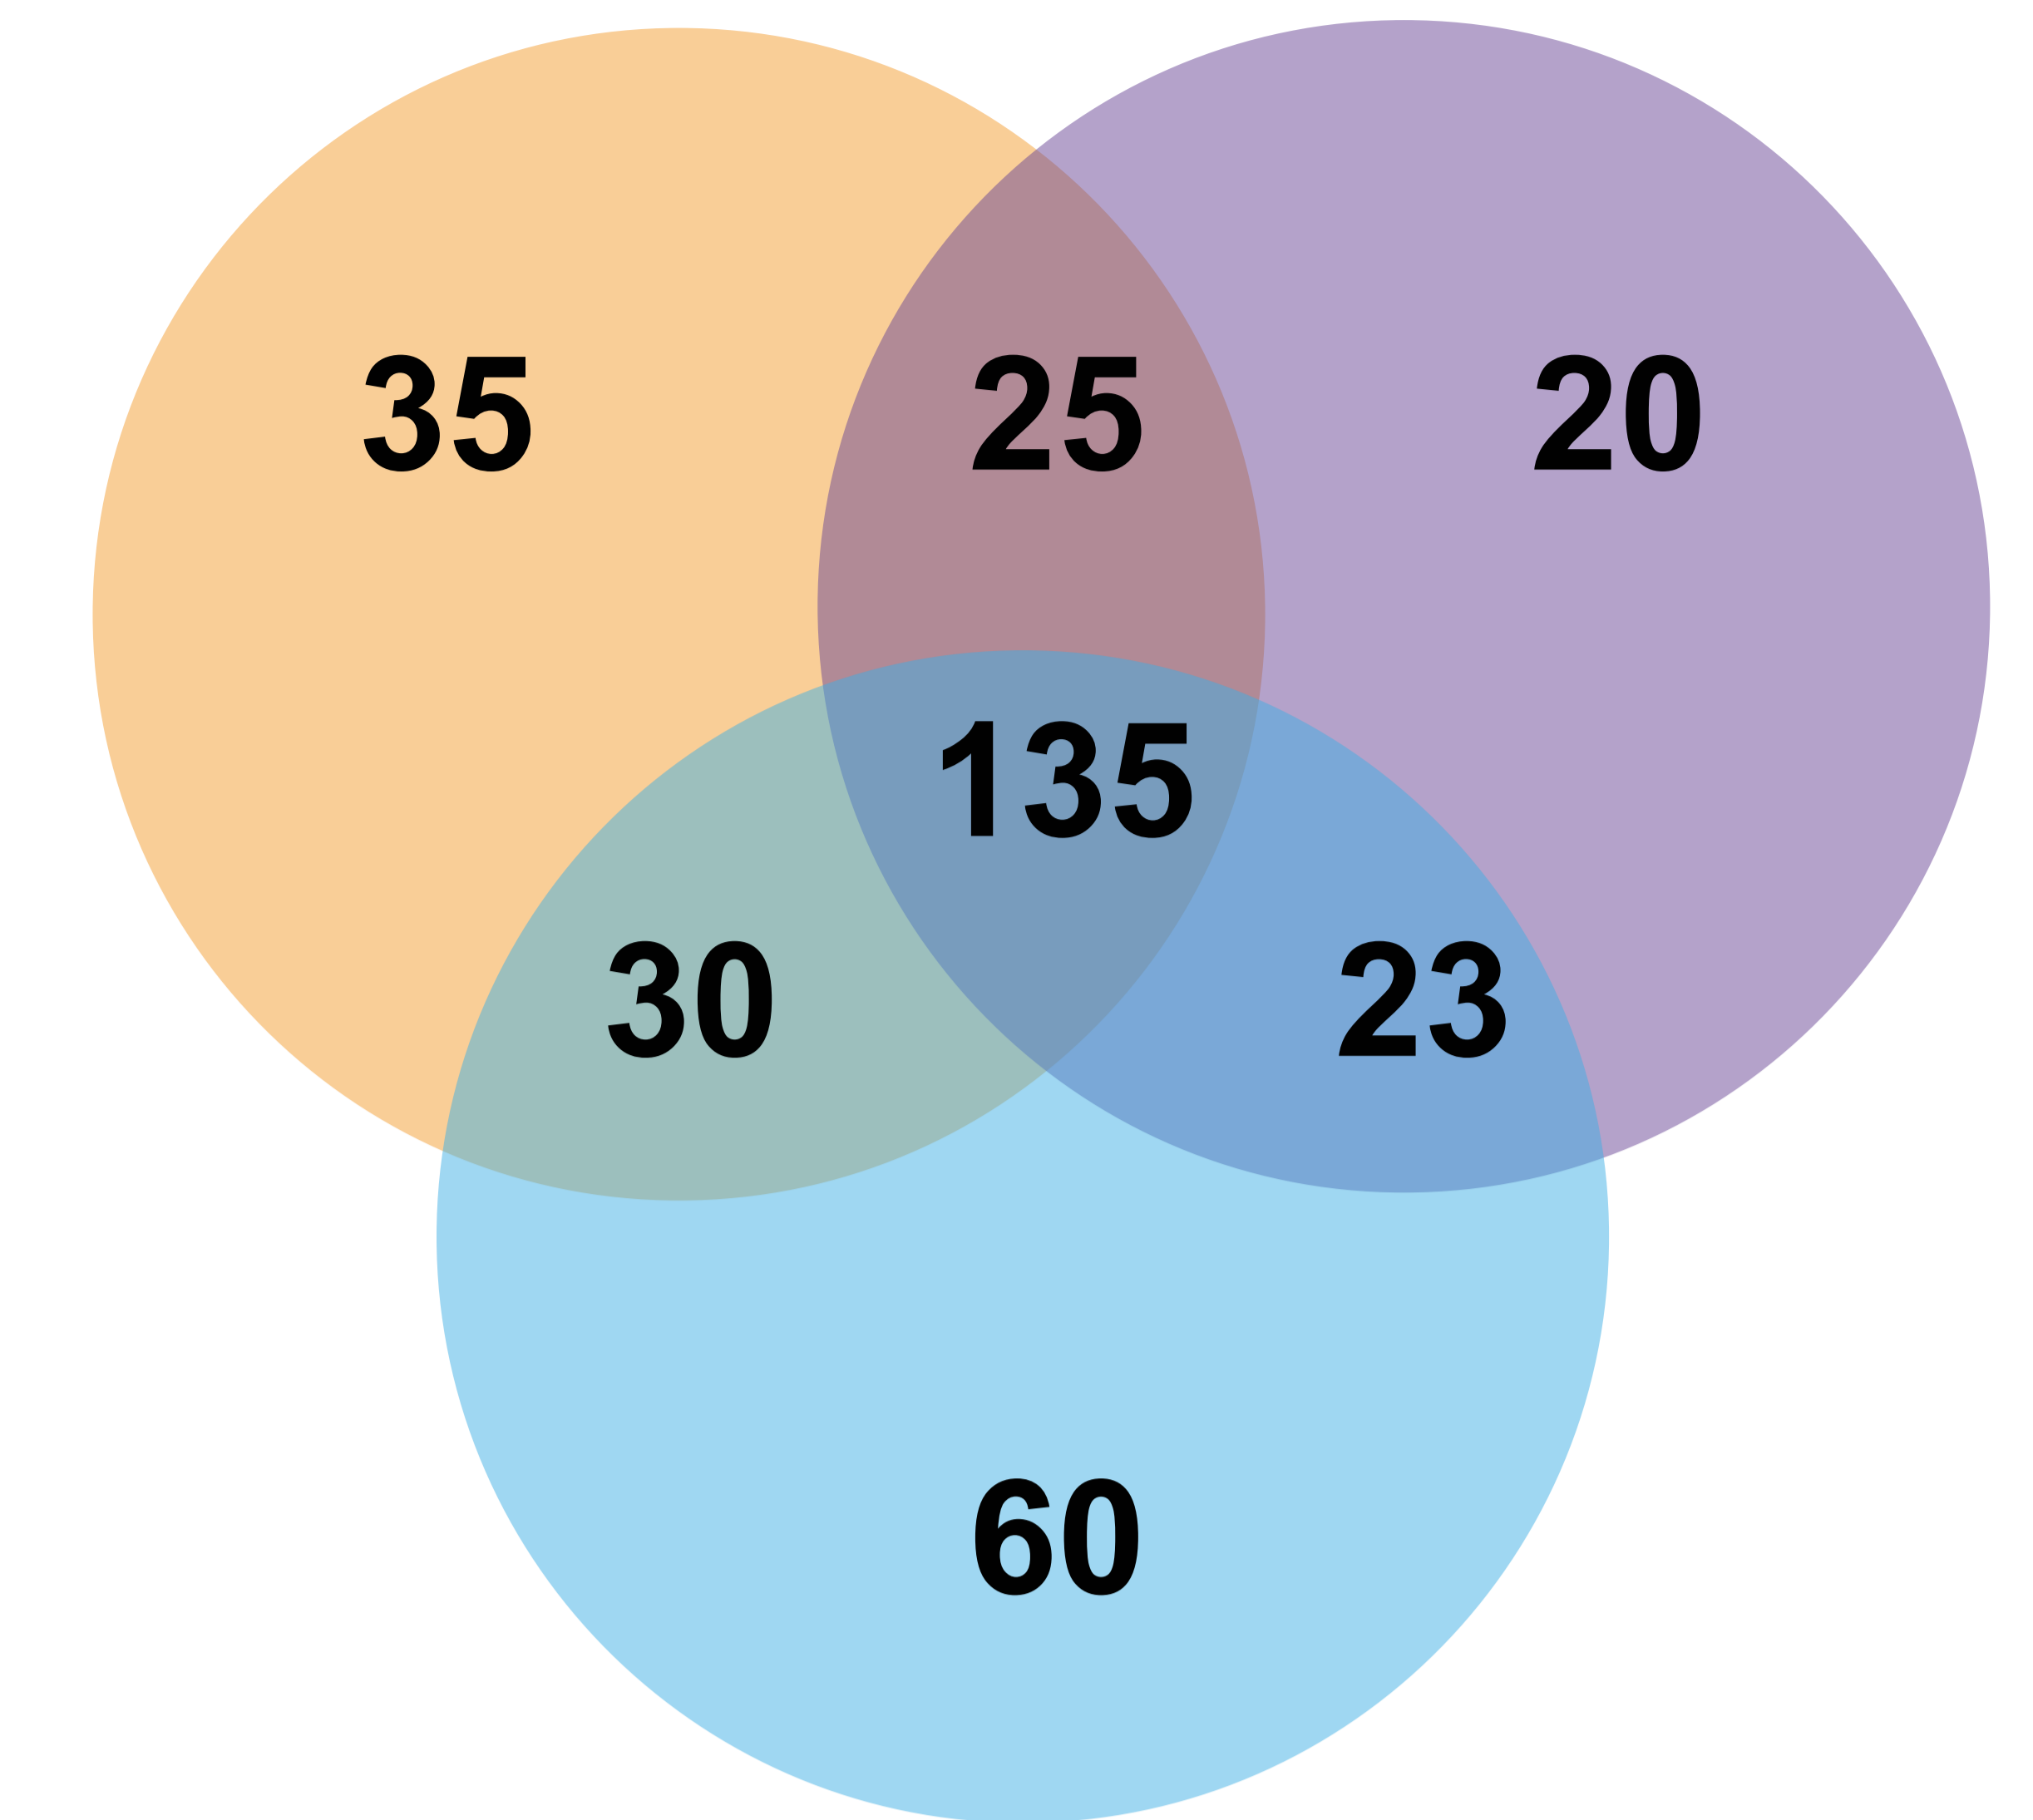

**Genus**  
Total: 327  
Asignation: 43%

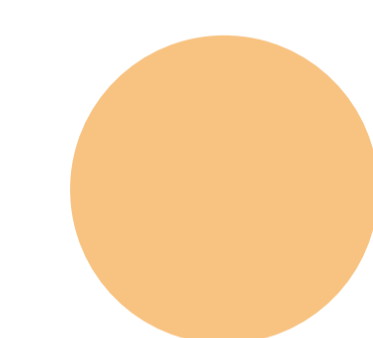

Bogotá

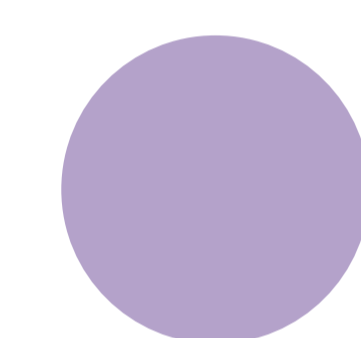

Sibundoy

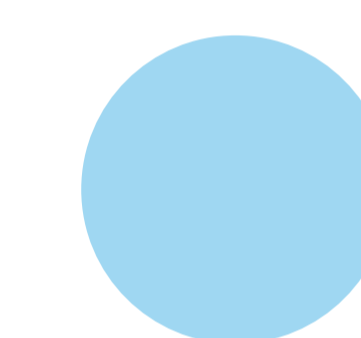

Palmira

## Venn diagram - Fungi

E

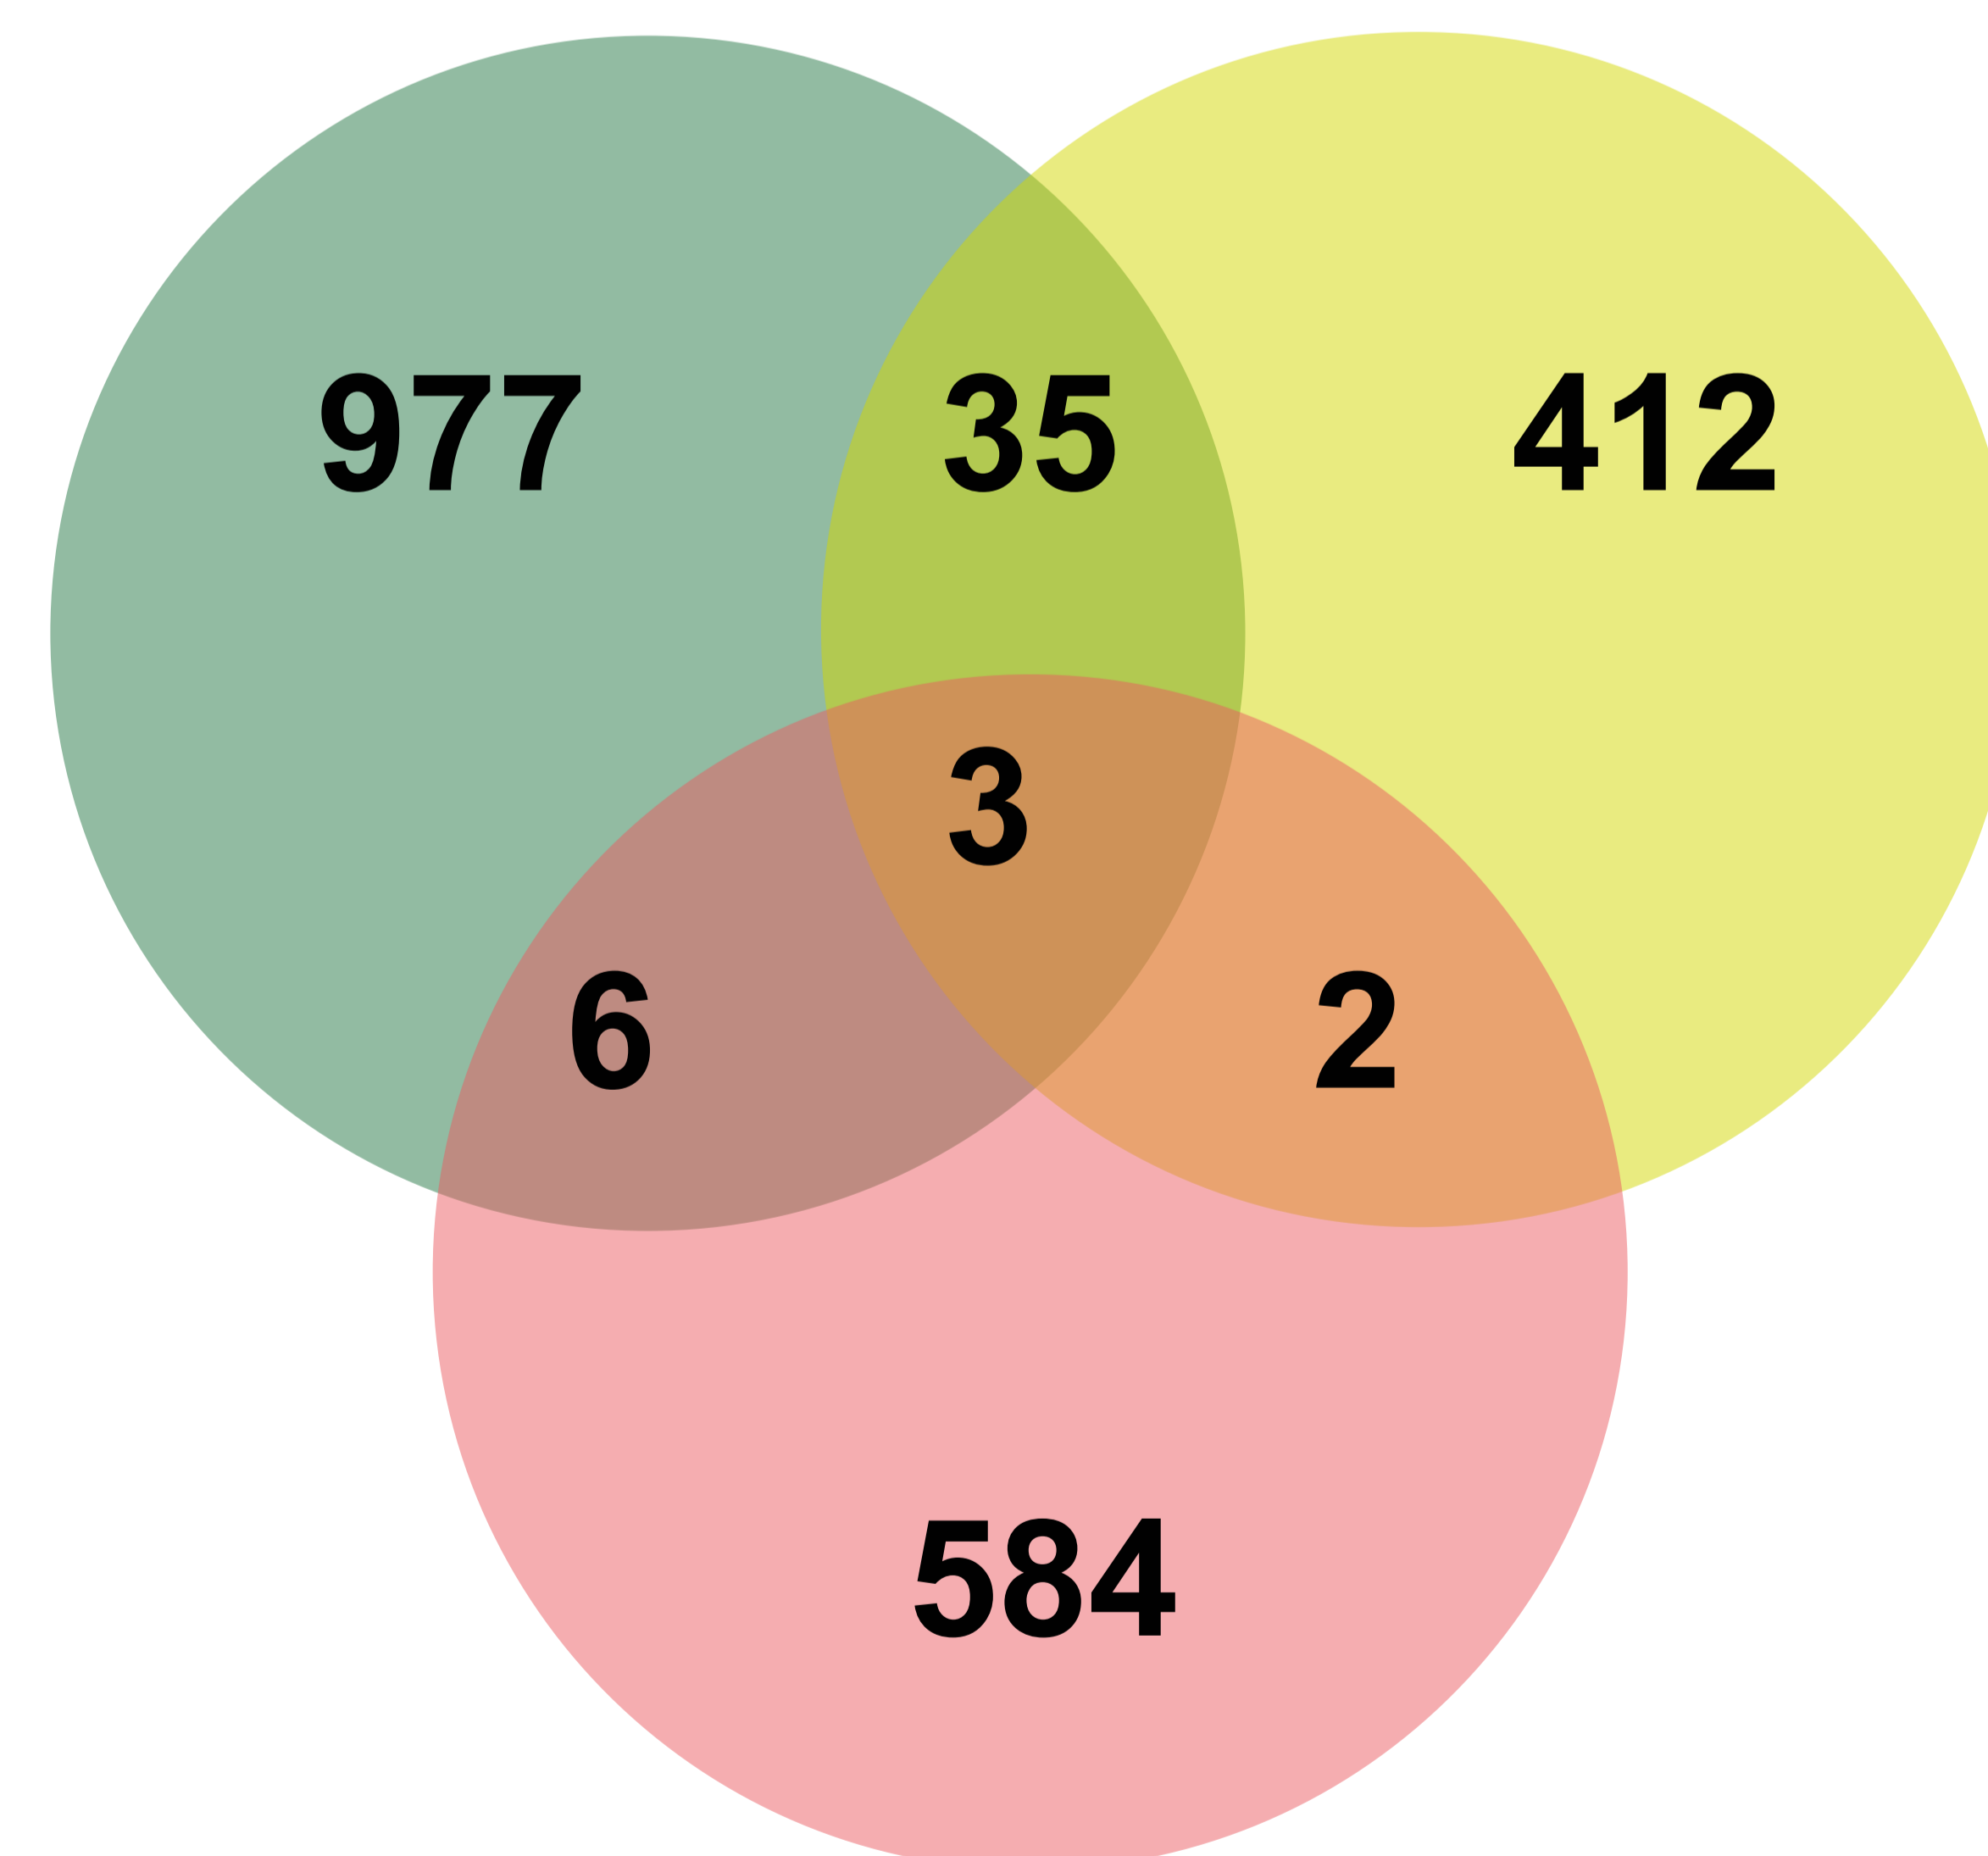

**ASV**  
Total: 2019

F

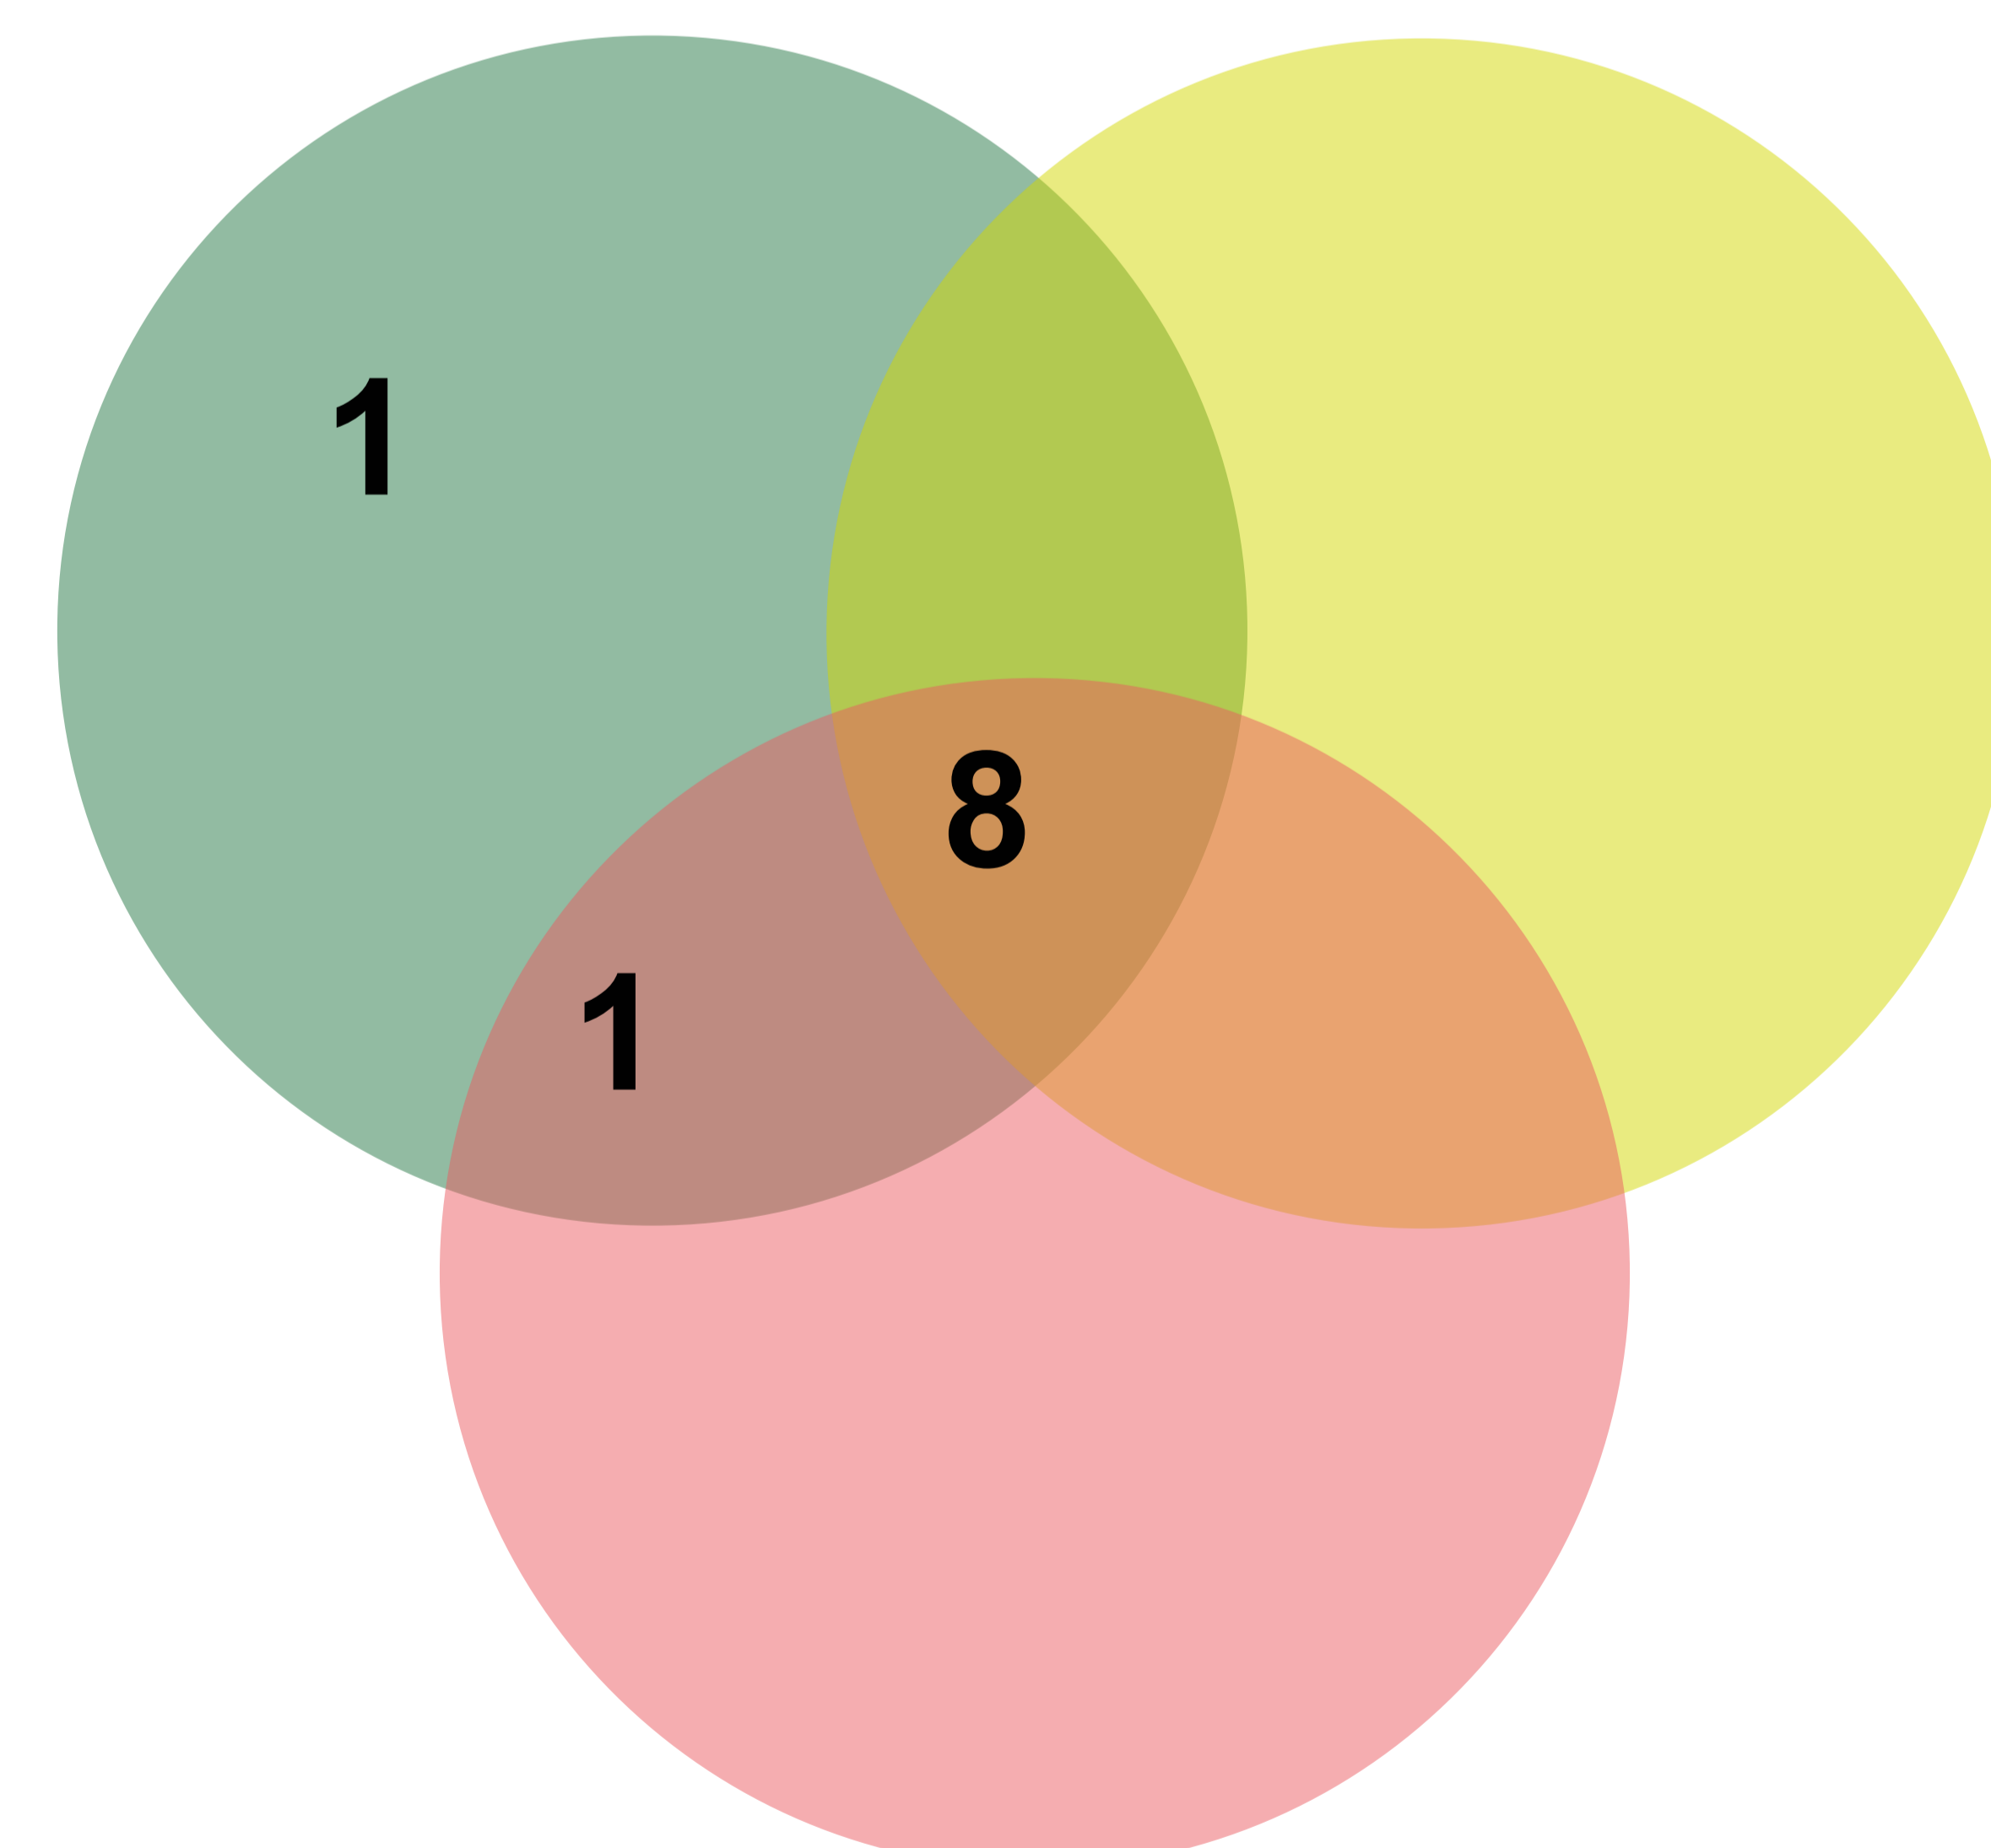

**Phylum**  
Total: 10  
Asignation: 100%

G

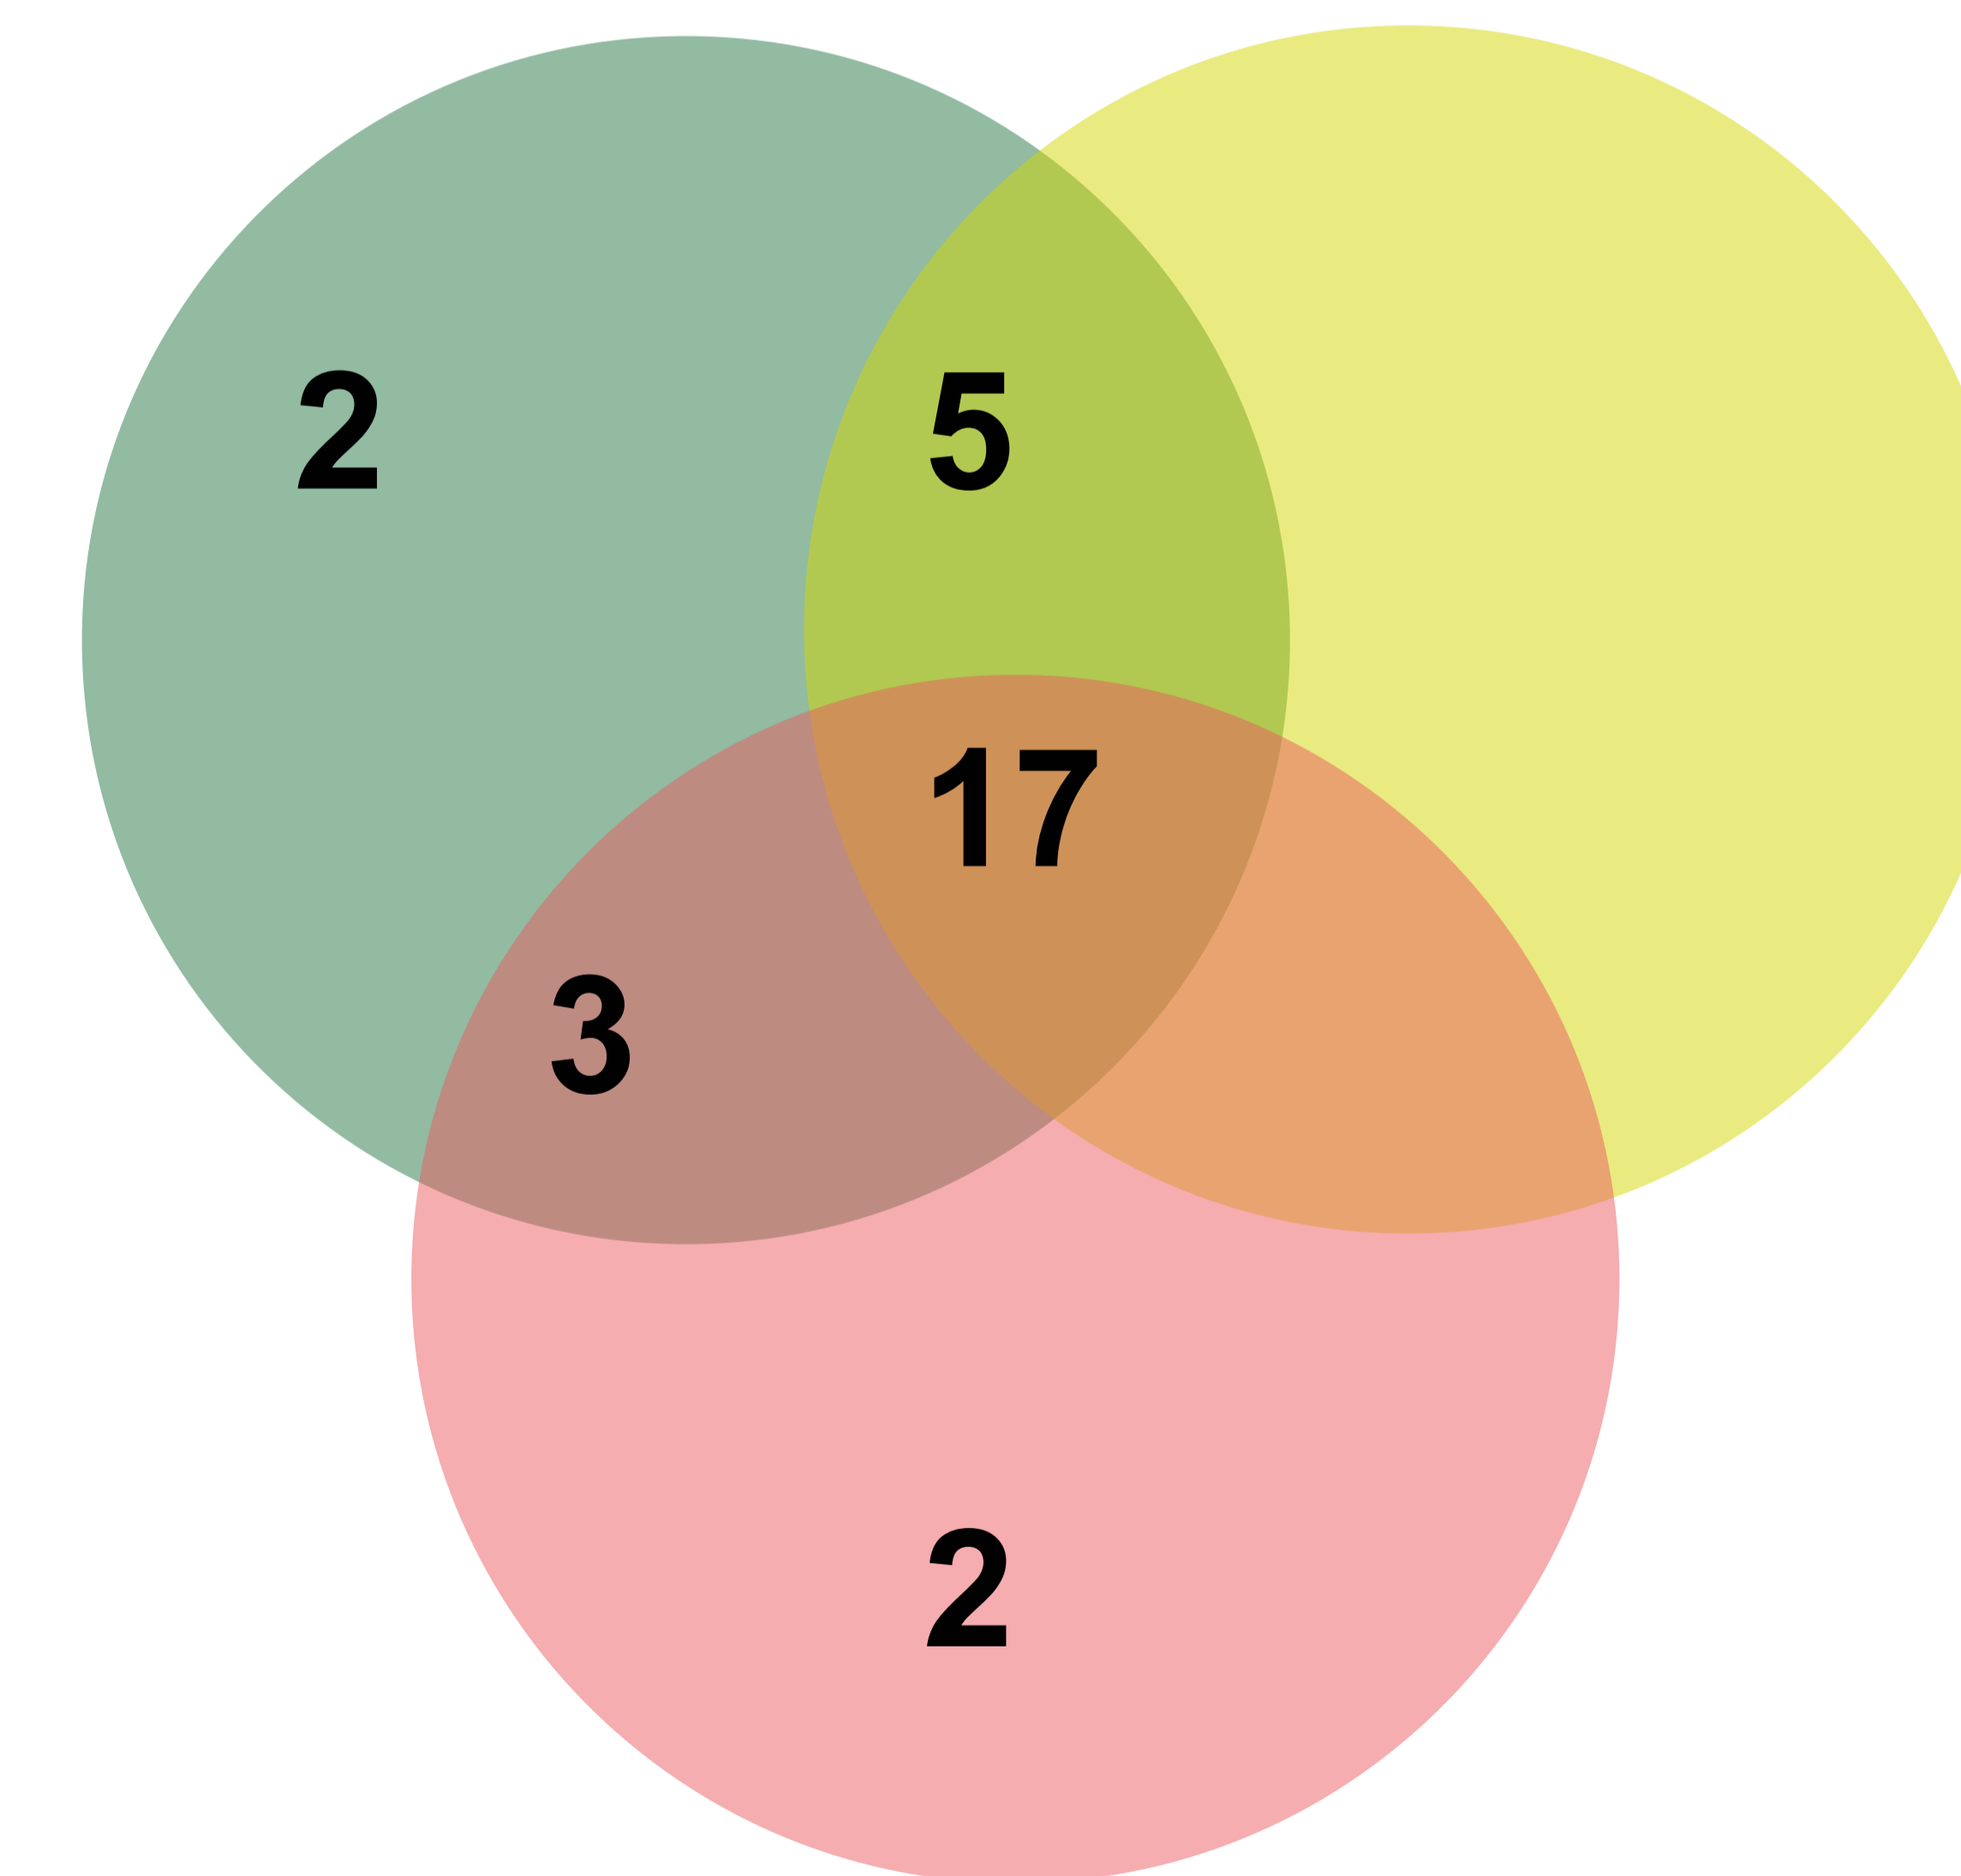

**Class**  
Total: 29  
Asignation: 93%

H

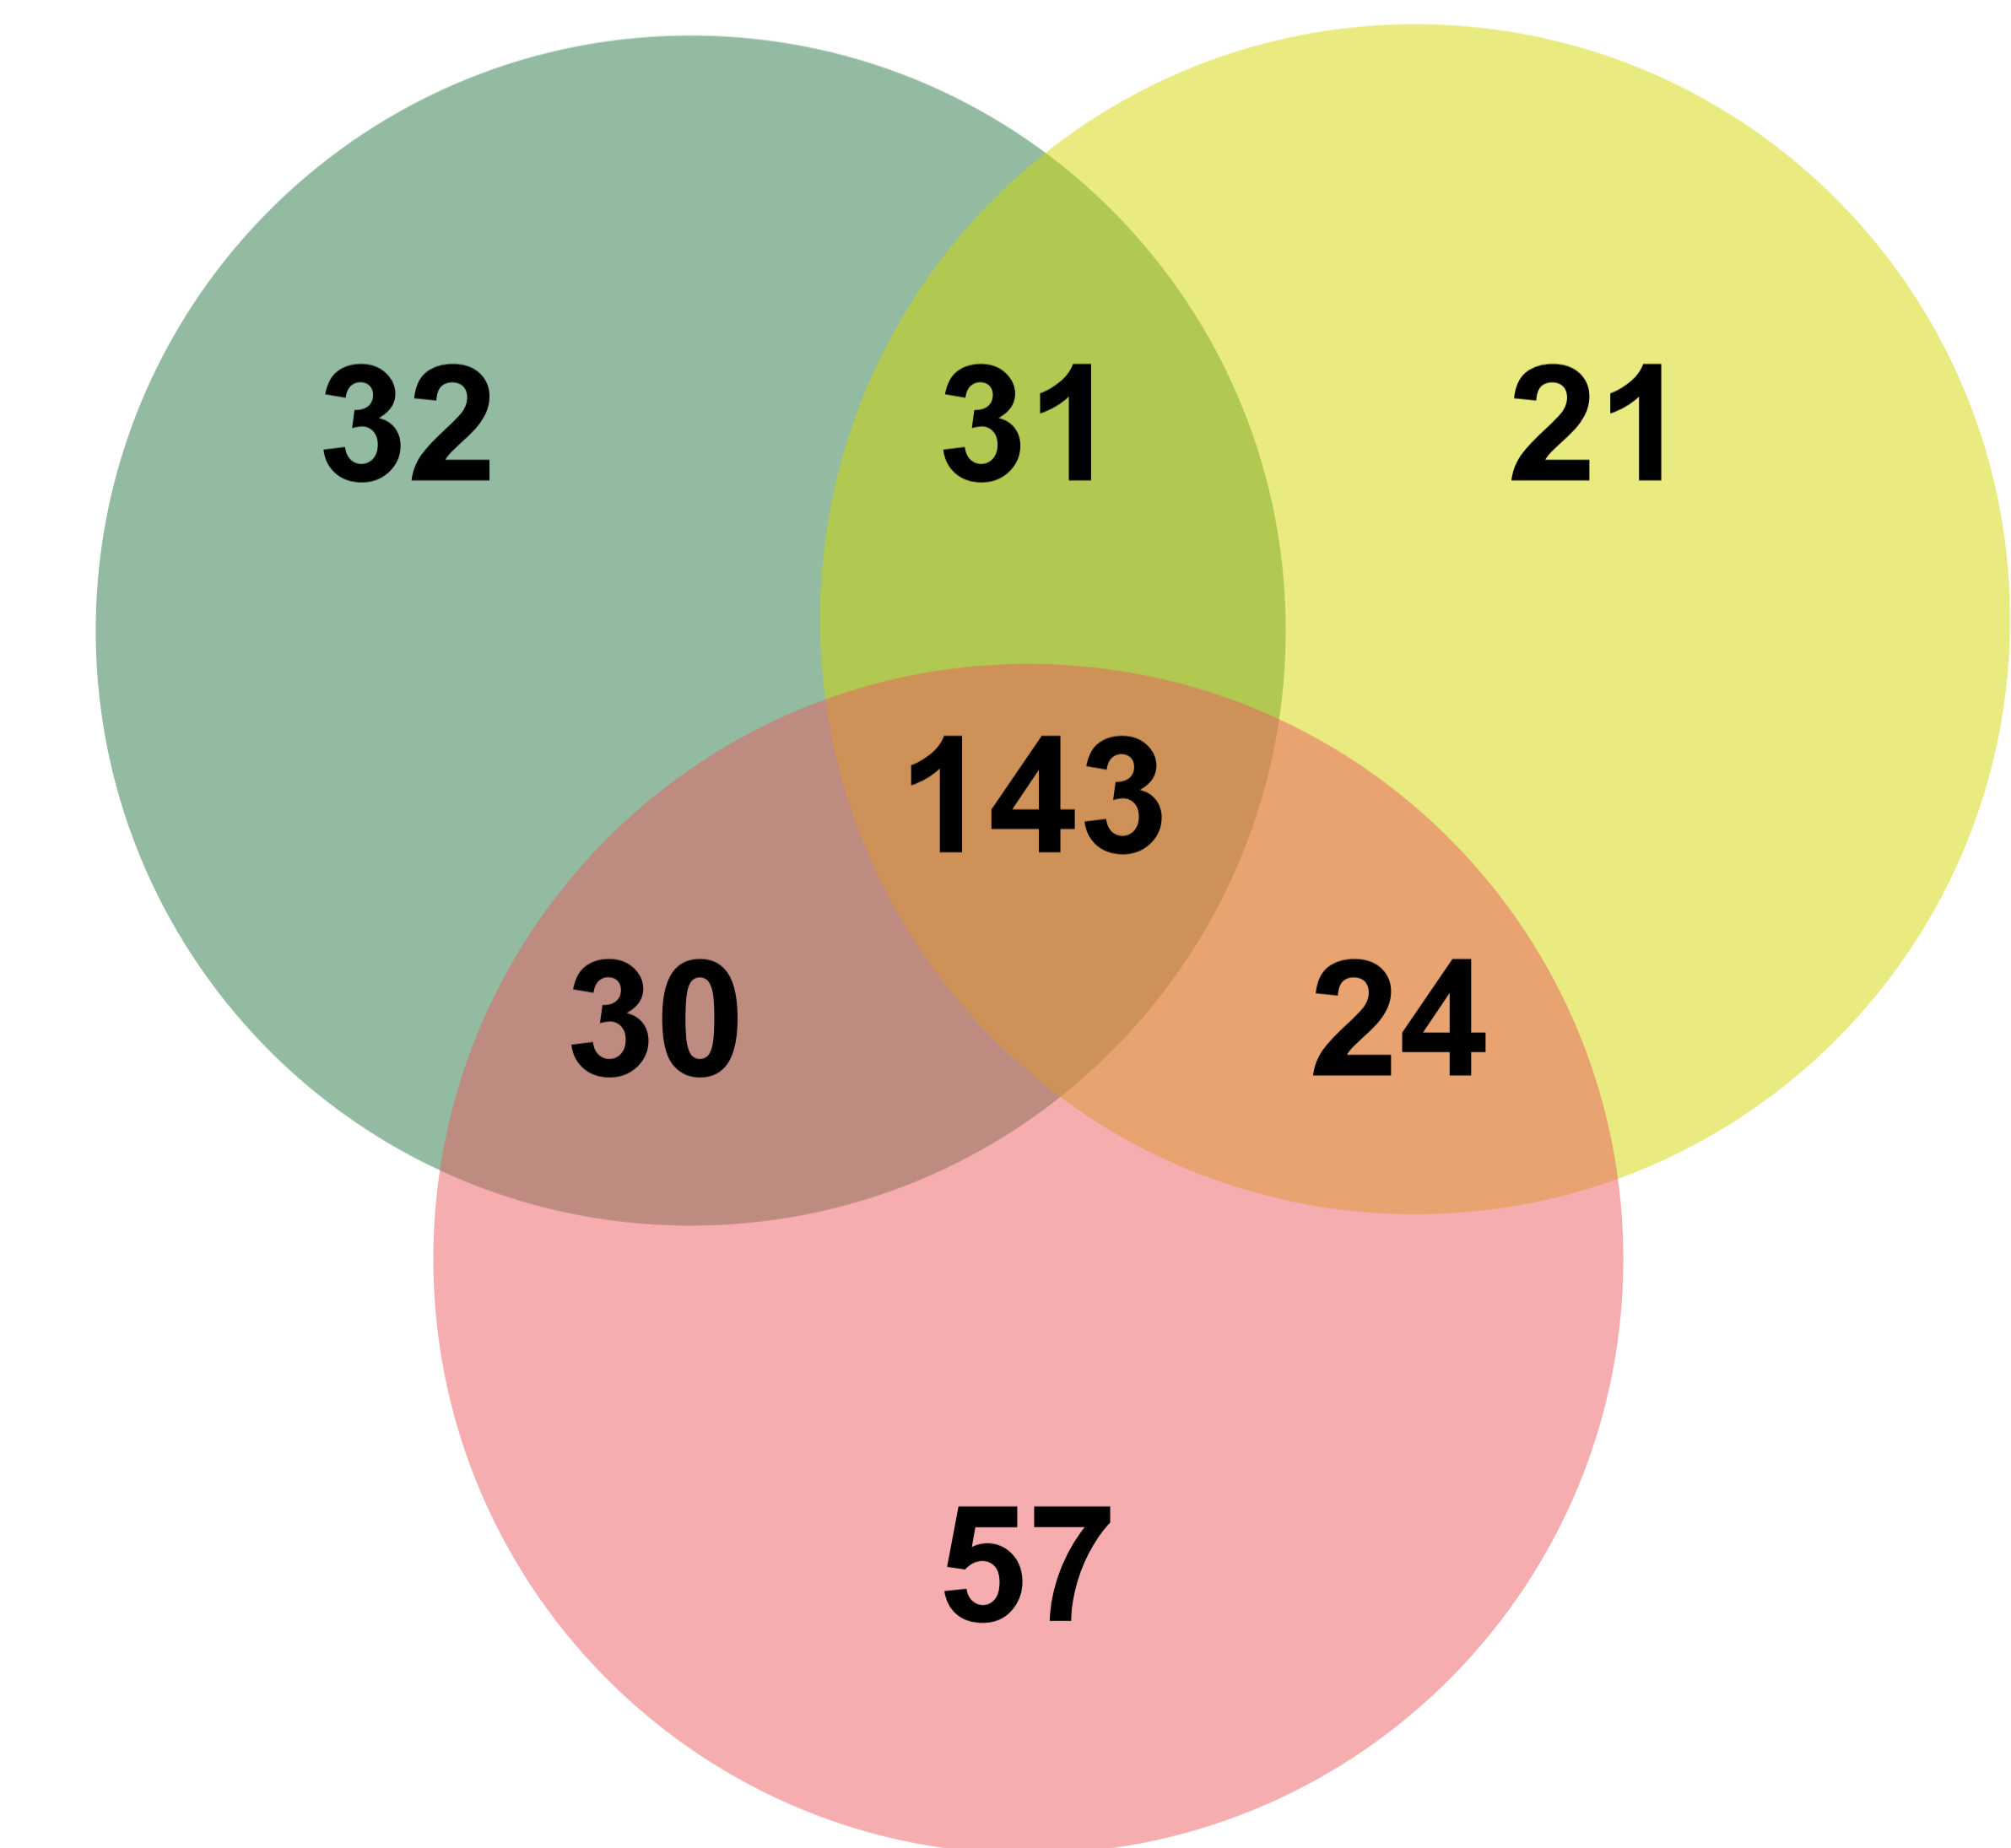

**Genus**  
Total: 164  
Asignation: 41%

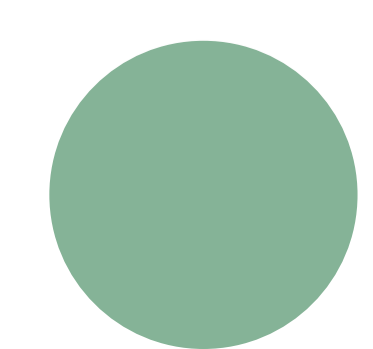

Bogotá

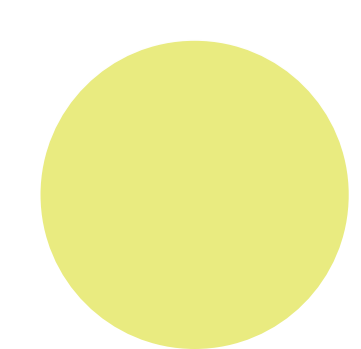

Sibundoy

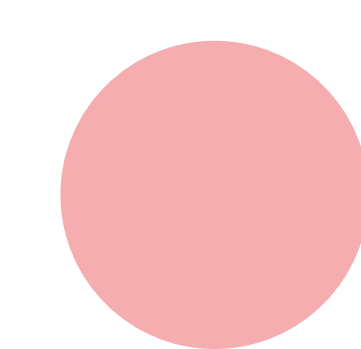

Palmira
