# Supplementary material for: Exploring Genomics and Microbial Ecology: Analysis of Bidens pilosa L. Genetic Structure and Soil Microbiome Diversity by RAD-Seq and Metabarcoding
Source: MDPI journal article supplement (doi:10.3390/plants13020221), 2024-01-13
Supplement: s1 [file s1]

| Table S4. Sampling site information |                         |       |               |               |               |                 |
|-------------------------------------|-------------------------|-------|---------------|---------------|---------------|-----------------|
| Specie                              | Populations             | ID    | N individuals | Latitude      | Longitude     | Altitude (masl) |
| <i>Bidens pilosa</i>                | Juan N Corpas - Bogotá  | Cor_1 | 3             | 4°45'44.5"    | 74°05'38.6"   | 2551            |
|                                     |                         | Cor_2 |               | 4°45'44.3"    | 74°05'38.4"   | 2551            |
|                                     |                         | Cor_3 |               | 4°45'44.1"    | 74°05'38.0"   | 2551            |
|                                     |                         | Cor_4 | 5             | 4°45'44.5"    | 74°05'38.6"   | 2551            |
|                                     |                         | Cor_5 |               | 4°45'44.3"    | 74°05'38.4"   | 2551            |
|                                     |                         | Cor_6 |               | 4°45'44.1"    | 74°05'38.0"   | 2551            |
|                                     |                         | Cor_7 |               | 4°45'44.1"    | 74°05'38.0"   | 2551            |
|                                     |                         | Cor_8 |               | 4°45'44.1"    | 74°05'38.0"   | 2551            |
|                                     | Sibundoy- Putumayo      | Sib_1 | 3             | 1° 11' 53.6"  | 76° 56' 35.6" | 2067            |
|                                     |                         | Sib_2 |               | 1° 11' 53 .5" | 76° 56' 35.6" | 2067            |
|                                     |                         | Sib_3 |               | 1° 11' 53 4"  | 76° 56' 35.5" | 2067            |
|                                     | Palmira-Valle del Cauca | Pal_1 | 5             | 3°25'33.82"   | 76°25'50.4"   | 988             |
|                                     |                         | Pal_2 |               | 3°25'33.4"    | 76°25'48.5"   | 988             |
|                                     |                         | Pal_3 |               | 3°25'32.6"    | 76°25'50.4"   | 988             |
|                                     |                         | Pal_4 |               | 3°25'32.7"    | 76°25'50.2"   | 979             |
|                                     |                         | Pal_5 |               | 3°25'35.5"    | 76°25'51.6"   | 979             |
