# Supplementary material for: Exploring Genomics and Microbial Ecology: Analysis of Bidens pilosa L. Genetic Structure and Soil Microbiome Diversity by RAD-Seq and Metabarcoding
Source: MDPI journal article supplement (doi:10.3390/plants13020221), 2024-01-13
Supplement: s1 [file s1]

**Table S2.** K values for samples of three populations

| <b>Sample</b> | <b>K1</b> | <b>K2</b> | <b>K3</b> |
|---------------|-----------|-----------|-----------|
| cor_1         | 0%        | 45%       | 55%       |
| cor_3         | 0%        | 45%       | 55%       |
| cor_4         | 0%        | 0%        | 100%      |
| cor_5         | 0%        | 100%      | 0%        |
| sib_1         | 100%      | 0%        | 0%        |
| sib_3         | 27%       | 0%        | 73%       |
| pal_2         | 0%        | 100%      | 0%        |
| pal_3         | 0%        | 100%      | 0%        |
| pal_4         | 15%       | 51%       | 35%       |
| pal_5         | 0%        | 100%      | 0%        |
