# Supplementary material for: Exploring Genomics and Microbial Ecology: Analysis of Bidens pilosa L. Genetic Structure and Soil Microbiome Diversity by RAD-Seq and Metabarcoding
Source: MDPI journal article supplement (doi:10.3390/plants13020221), 2024-01-13
Supplement: s1 [file s1]

# CLUMPAK main pipeline - Job 1698372789 summary

Major modes for the uploaded data:

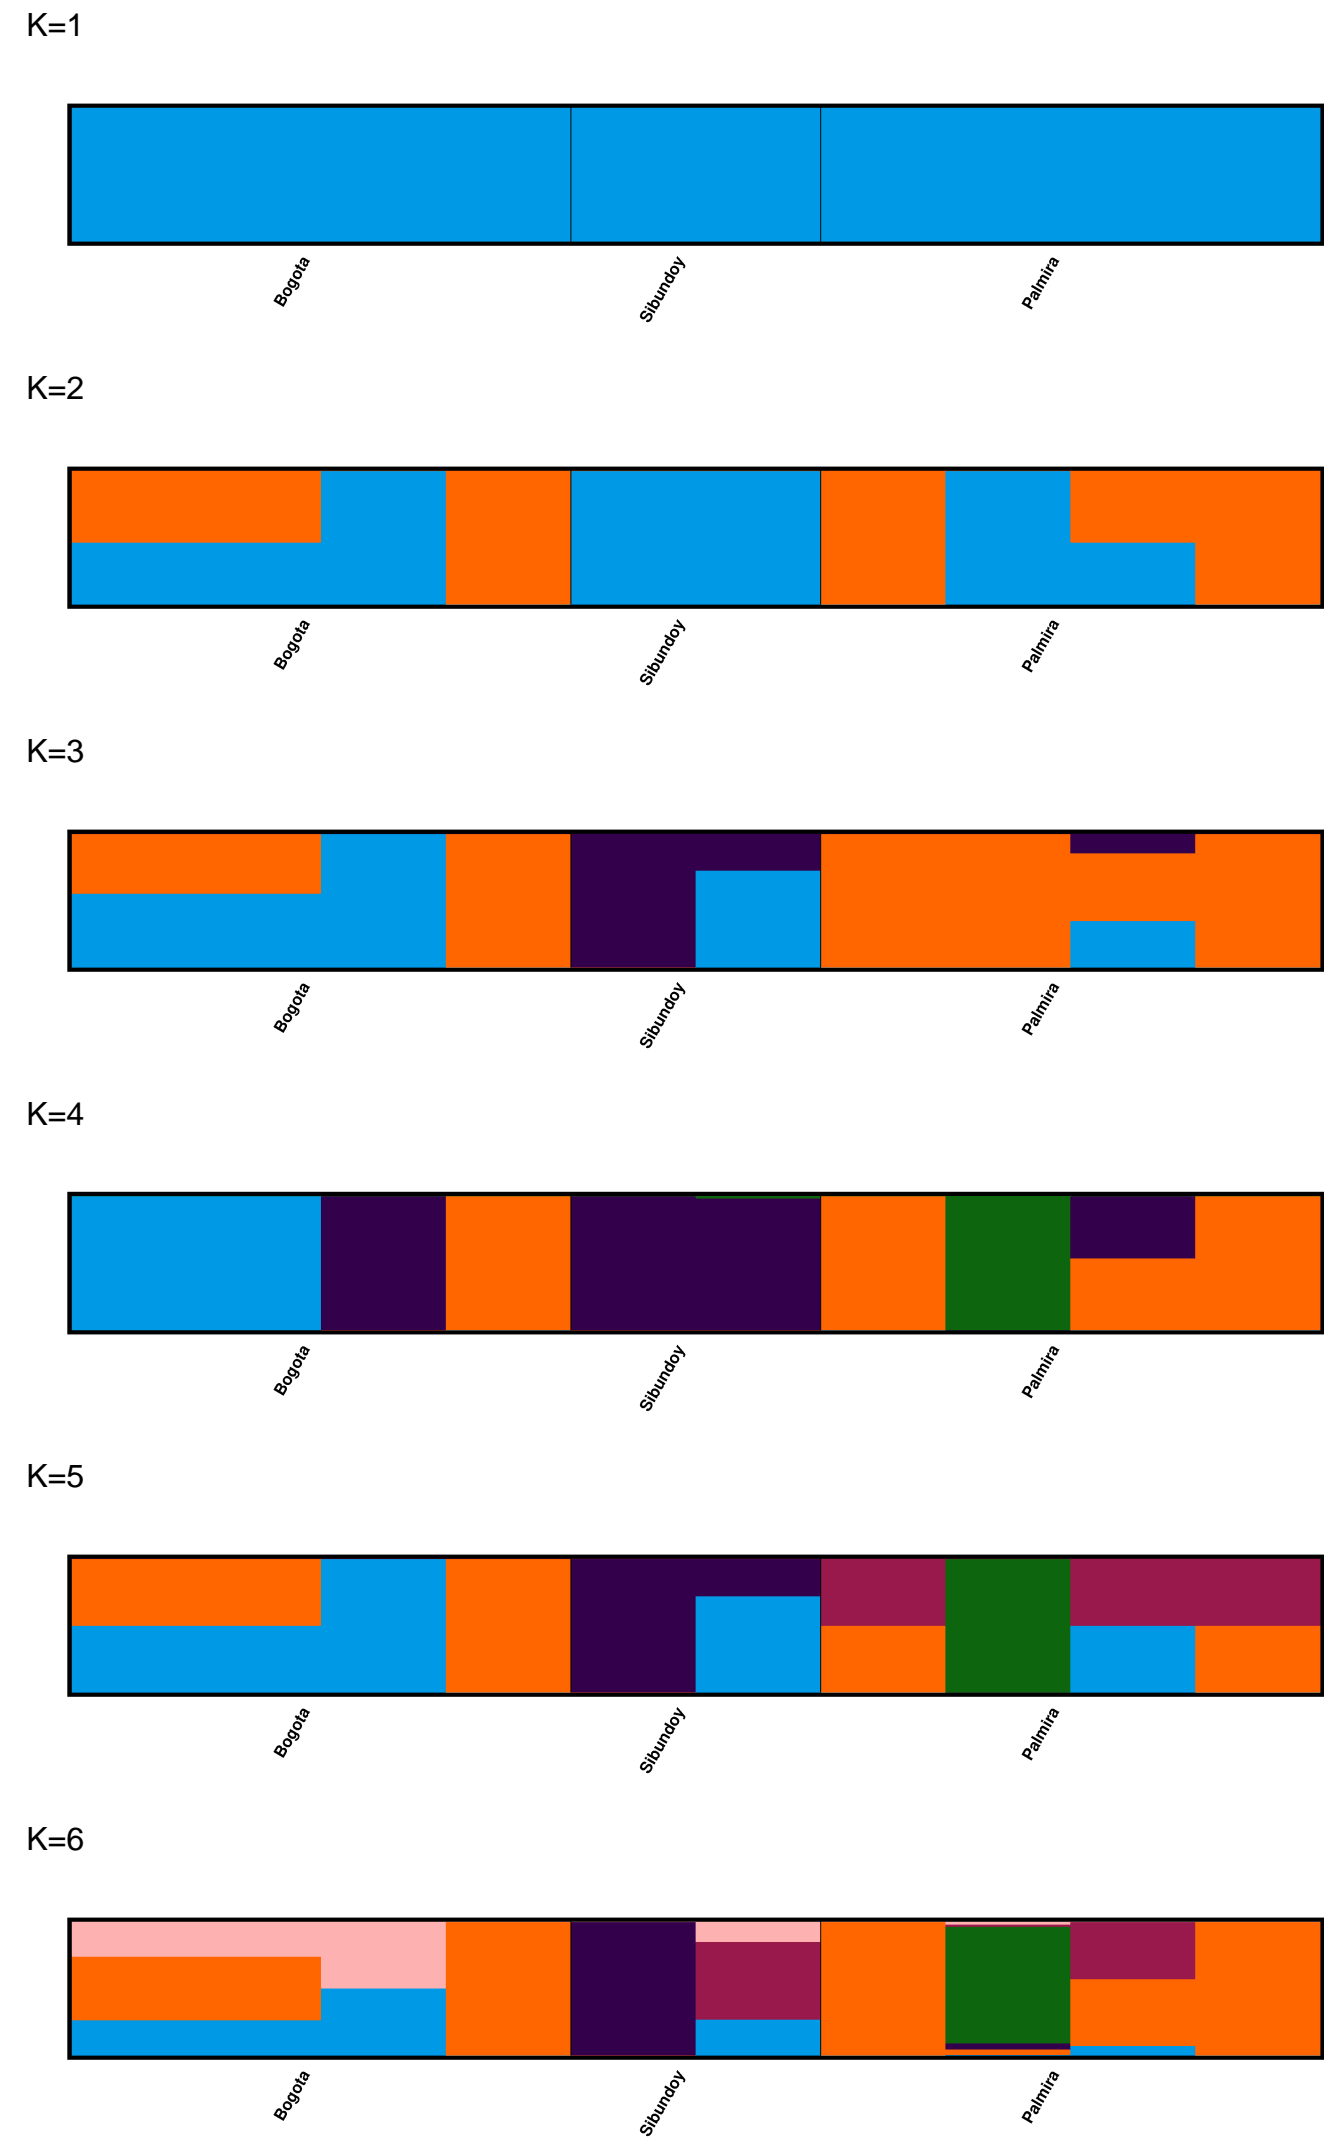

Minor modes for the uploaded data:

Division of runs by mode:

|     |       |
|-----|-------|
| K=1 | 30/30 |
| K=2 | 30/30 |
| K=3 | 30/30 |
| K=4 | 30/30 |
| K=5 | 30/30 |
| K=6 | 30/30 |
