# Supplementary material for: Exploring Genomics and Microbial Ecology: Analysis of Bidens pilosa L. Genetic Structure and Soil Microbiome Diversity by RAD-Seq and Metabarcoding
Source: MDPI journal article supplement (doi:10.3390/plants13020221), 2024-01-13
Supplement: s1 [file s1]

Table S1. Pipeline Stacks Results

| Barcode         | Filename | Fastqc         |                 |     | Process_radtags |             |                | Tsv2bam                     | gstacks                        |                 |          |             |
|-----------------|----------|----------------|-----------------|-----|-----------------|-------------|----------------|-----------------------------|--------------------------------|-----------------|----------|-------------|
|                 |          | Total sequence | Sequence length | %GC | Total RAD       | Low Quality | Retained Reads | sample loci to catalog loci | effective_coverages_per_sample |                 |          |             |
|                 |          |                |                 |     |                 |             |                |                             | n_loci                         | n_used_fw_reads | mean_cov | mean_cov_ns |
| GCAATATACATGCAG | cor_1    | 28.784         | 117             | 54  | 2.878.859       | 230         | 2.878.629      | 233.846                     | 233.579                        | 2.400.847       | 10.279   | 11.671      |
| AAGAATTCGGTGCAG | cor_2    | 18.399         | 117             | 59  | 1.966.710       | 142         | 1.966.568      | 177.946                     | 15.419                         | 98.047          | 6.359    | 6.427       |
| TCGGCAGTCGTGCAG | cor_3    | 15.499         | 117             | 50  | 1.528.291       | 123         | 1.528.168      | 147.894                     | 243.357                        | 1.888.196       | 7.759    | 8.312       |
| AGTTCCATTGTGCAG | corsib_1 | 59.528         | 117             | 53  | 4.426.504       | 370         | 4.426.134      | 391.320                     | 60.923                         | 425.681         | 6.987    | 6.838       |
| TTCTGCGCTTGCAG  | corsib_2 | 8.995          | 117             | 51  | 487.158         | 50          | 487.108        | 58.964                      | 656.060                        | 6.967.417       | 10.620   | 13.184      |
| AGCAATCTAATGCAG | corsib_3 | 20.077         | 117             | 48  | 1.436.769       | 121         | 1.436.648      | 149.444                     | 185.500                        | 1.666.463       | 8.984    | 10.116      |
| GAATTGTCGCTGCAG | corsib_4 | 2.565          | 117             | 49  | 187.174         | 20          | 187.154        | 23.805                      | 836.628                        | 10.159.803      | 12.144   | 16.230      |
| CTTCGACATATGCAG | corsib_5 | 5.086          | 117             | 45  | 379.166         | 28          | 379.138        | 49.265                      | 167.002                        | 1.113.703       | 6.669    | 7.153       |
| GAGATATGGTTGCAG | sib_1    | 60.973         | 117             | 52  | 3.072.204       | 230         | 3.071.974      | 15.467                      | 177.802                        | 1.714.945       | 9.645    | 10.186      |
| CTCCTTGGAGTGCAG | sib_2    | 2.760          | 117             | 48  | 123.302         | 10          | 123.292        | 243.825                     | 147.689                        | 1.288.288       | 8.723    | 9.901       |
| GTGTCTCTTGTGCAG | sib_3    | 33.497         | 117             | 52  | 2.366.944       | 167         | 2.366.777      | 310.503                     | 390.768                        | 3.784.425       | 9.685    | 10.188      |
| TGCAGTTATCTGCAG | pal_1    | 6.821          | 117             | 53  | 531.273         | 34          | 531.239        | 61.028                      | 58.864                         | 395.432         | 6.718    | 6.763       |
| TTCTGGAATATGCAG | pal_2    | 125.833        | 117             | 55  | 10.714.124      | 877         | 10.713.247     | 657.154                     | 149.235                        | 1.152.516       | 7.723    | 8.985       |
| ACGCAACACATGCAG | pal_3    | 19.015         | 117             | 51  | 1.945.096       | 138         | 1.944.958      | 185.713                     | 23.740                         | 146.828         | 6.185    | 6.323       |
| ACTGCCTCAATGCAG | pal_4    | 215.429        | 117             | 53  | 14.414.533      | 1.057       | 14.413.476     | 838.144                     | 49.036                         | 294.042         | 5.996    | 6.144       |
| ACATCAATATTGCAG | pal_5    | 18.690         | 117             | 50  | 1.404.006       | 106         | 1.403.900      | 167.378                     | 310.155                        | 2.649.635       | 8.543    | 9.166       |
