# Supplementary figures and images for: Exploring Genomics and Microbial Ecology: Analysis of Bidens pilosa L. Genetic Structure and Soil Microbiome Diversity by RAD-Seq and Metabarcoding
Source: MDPI journal article supplement (doi:10.3390/plants13020221), 2024-01-13

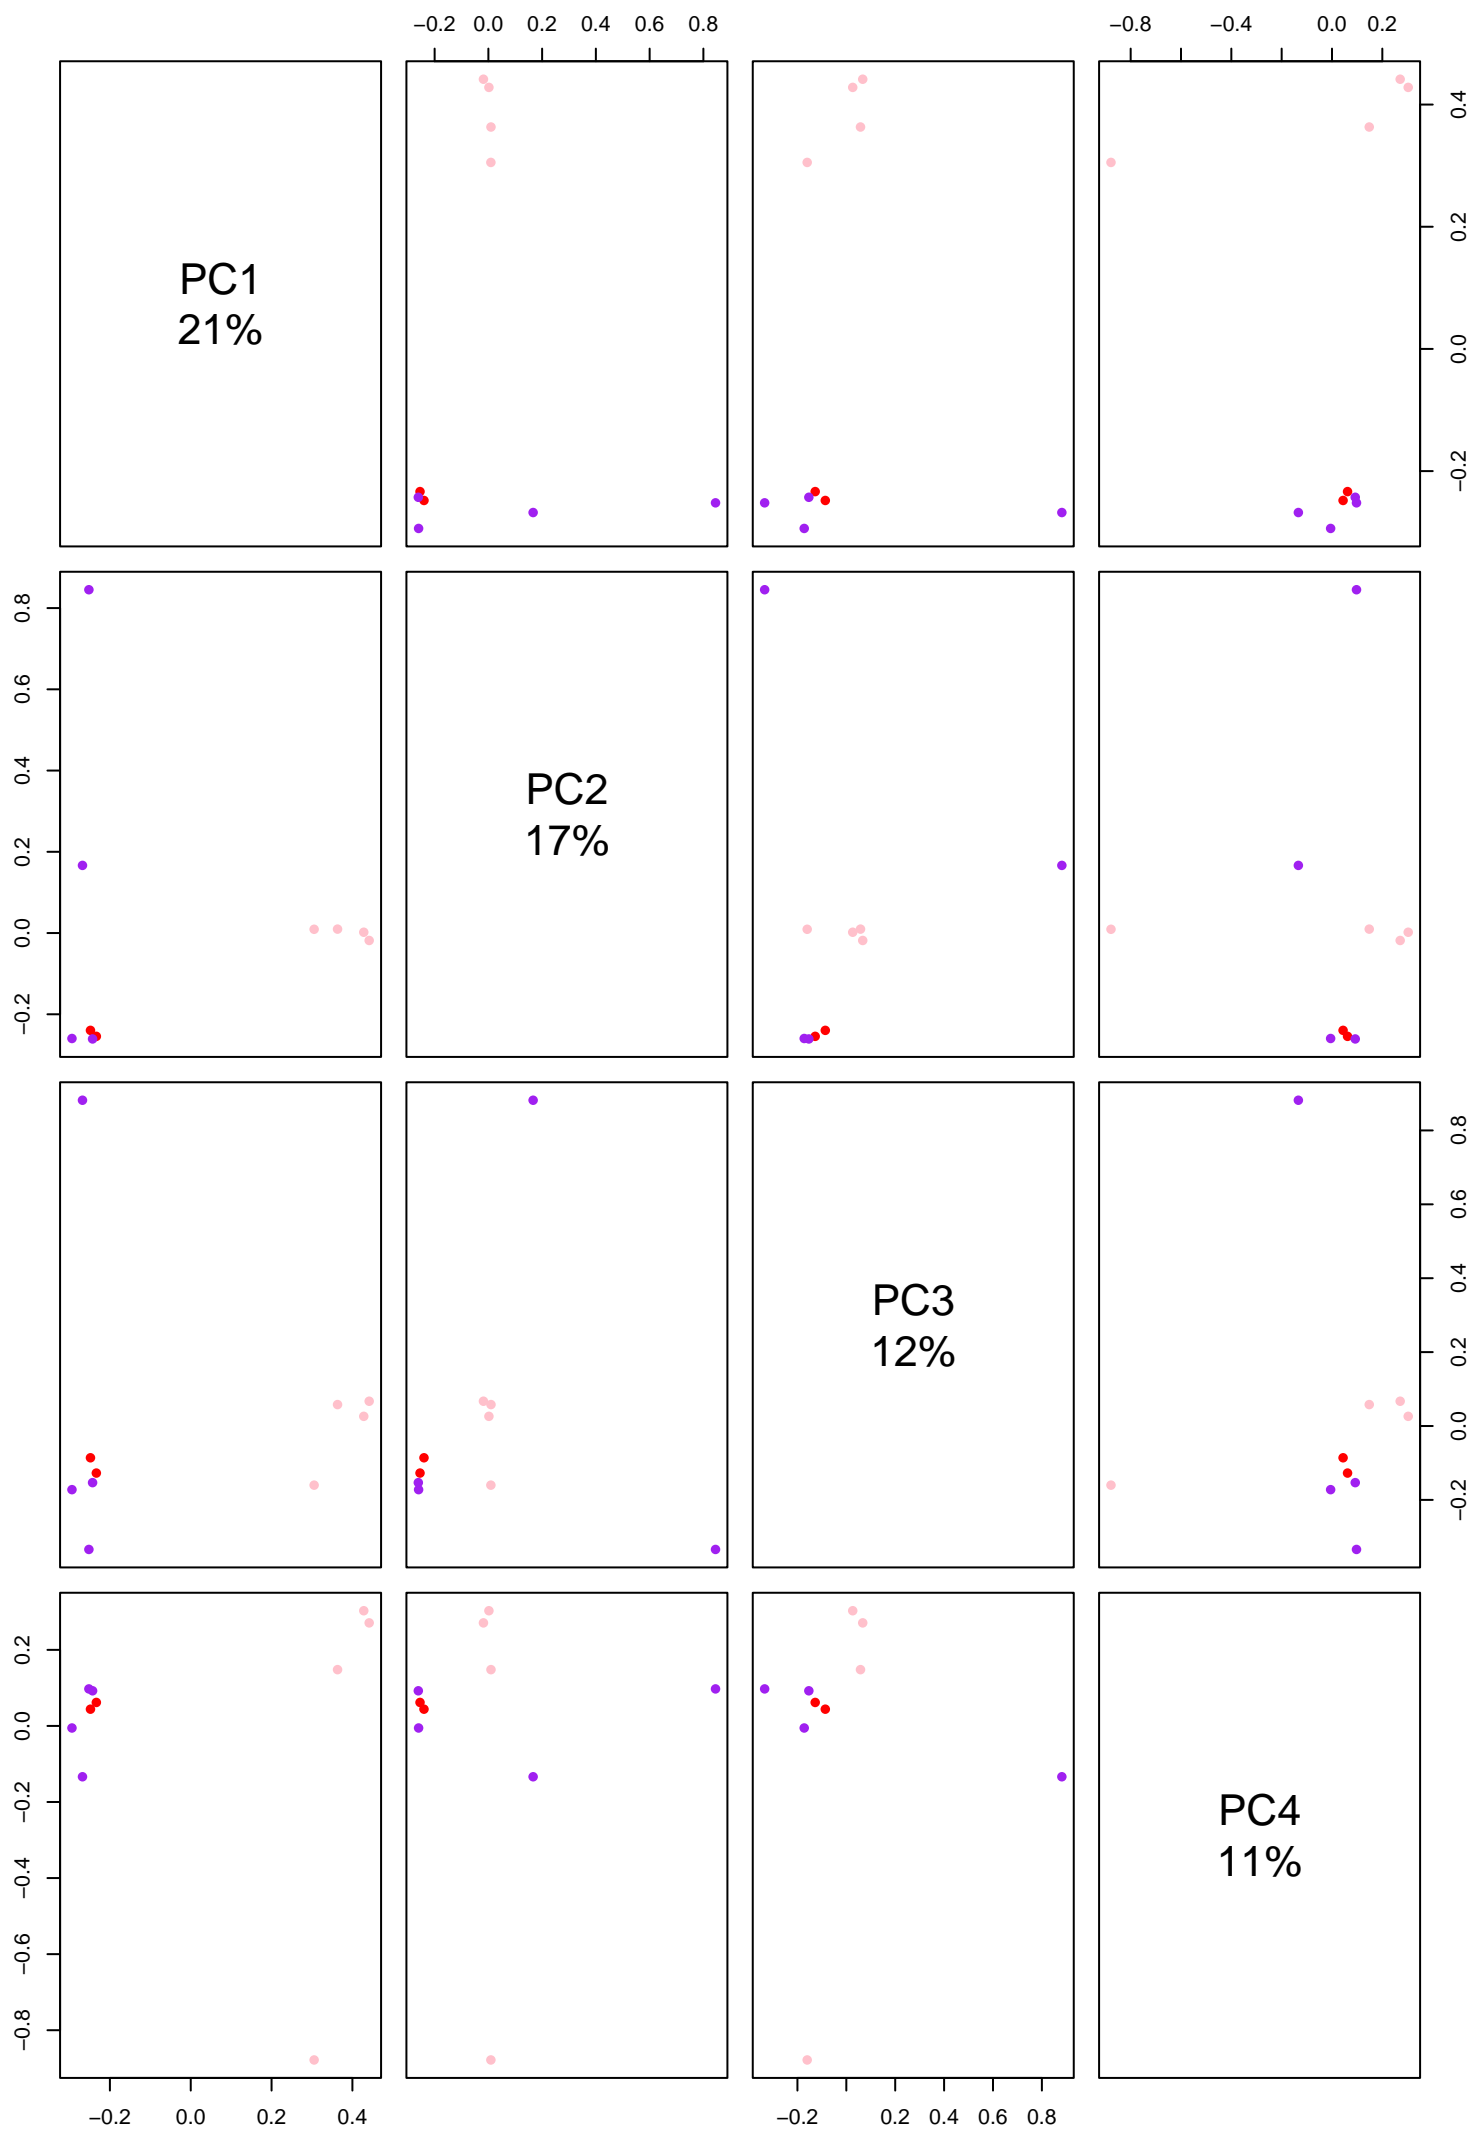

Supplement: s1 [file s1]

**A****Genus**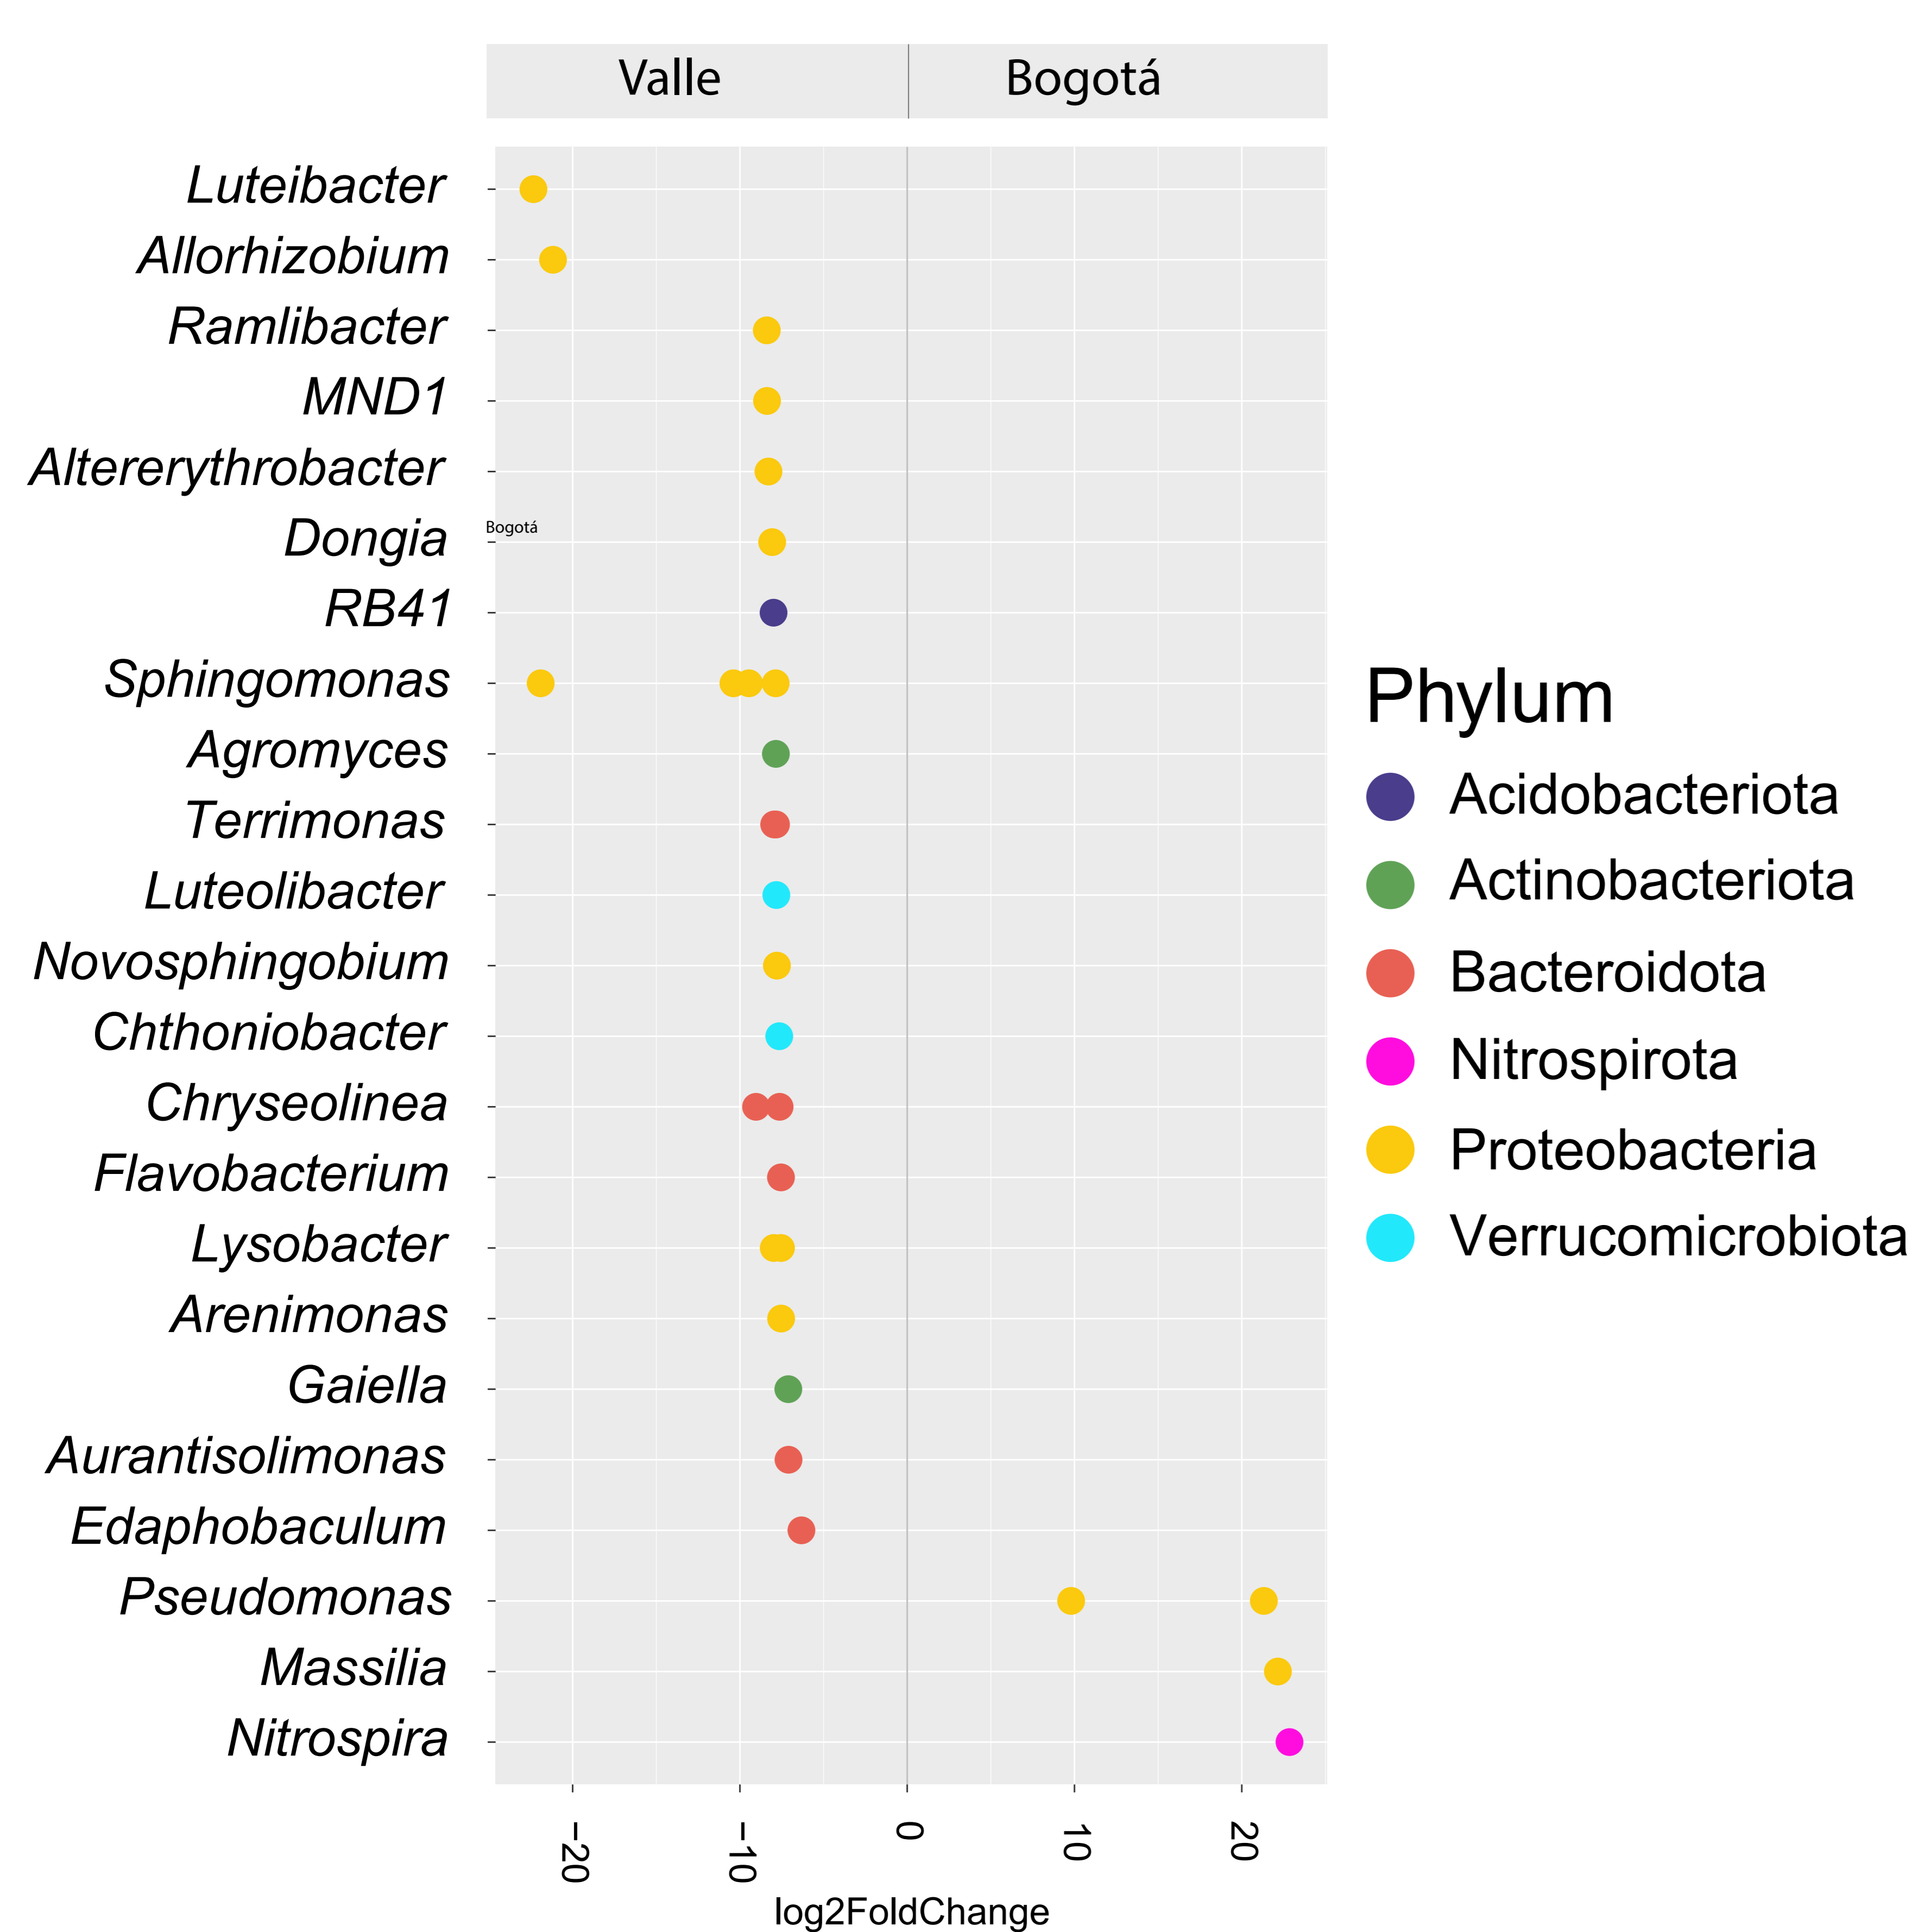**B****Genus**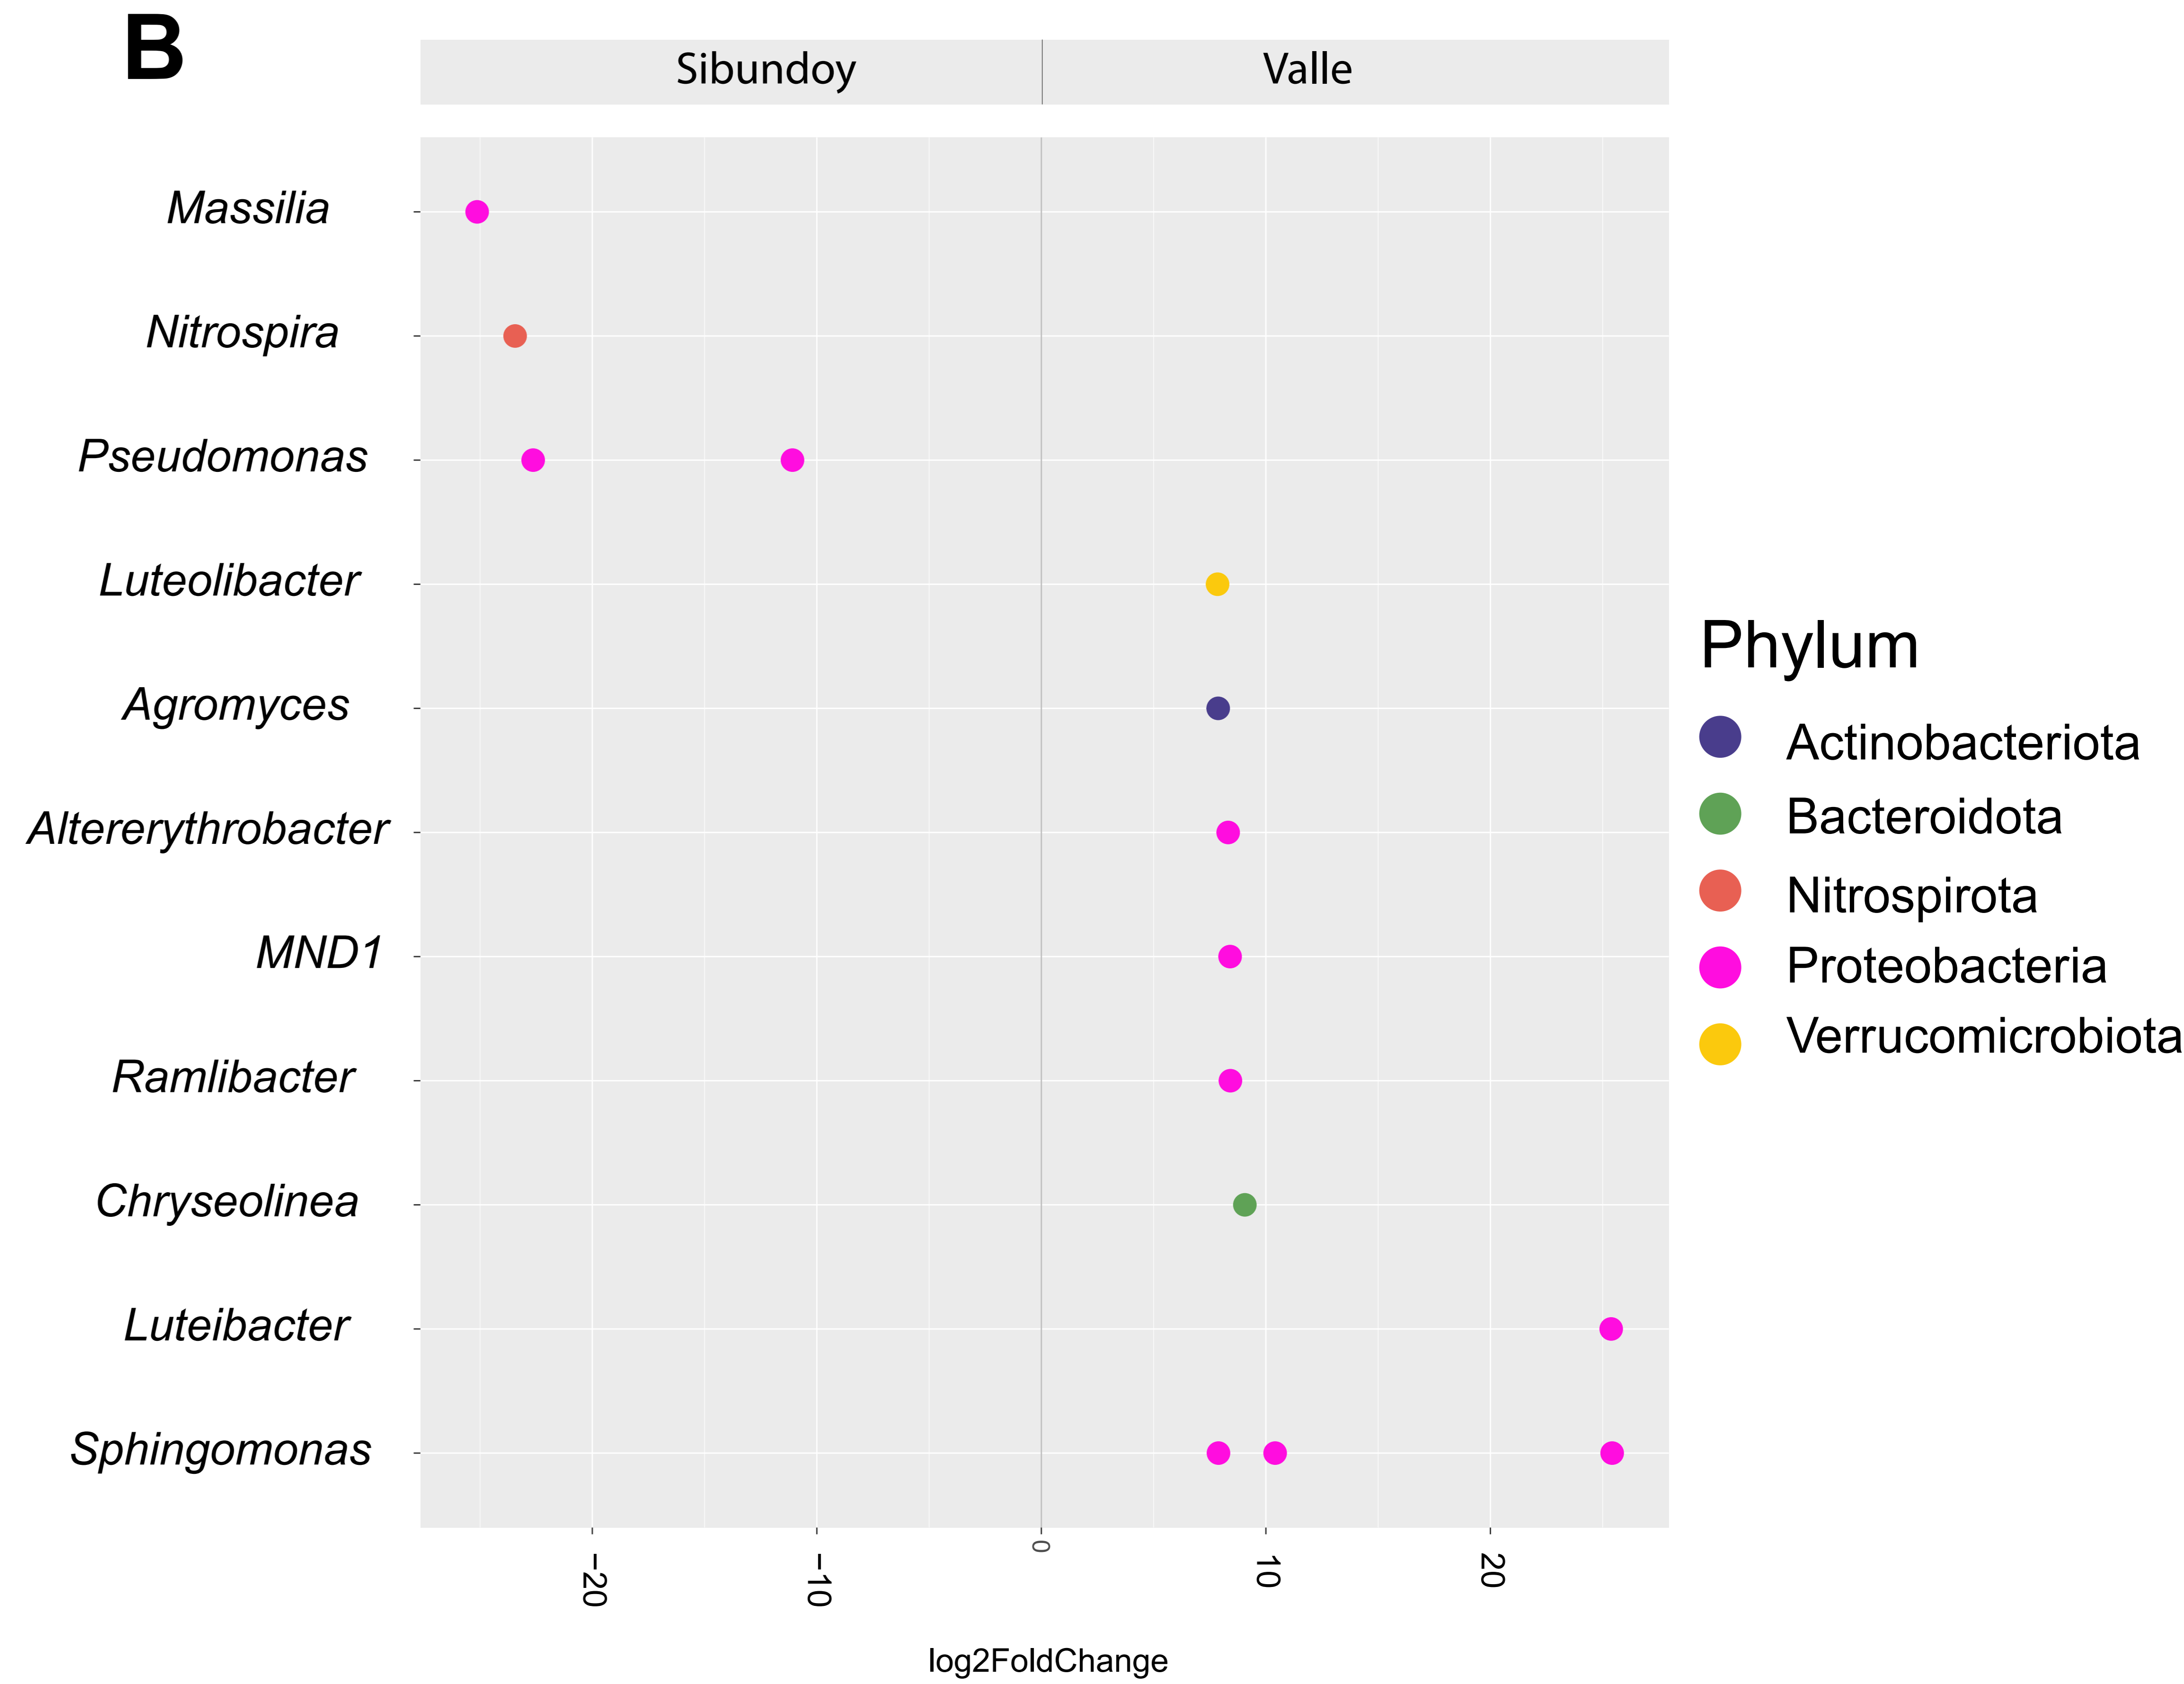**C****Genus**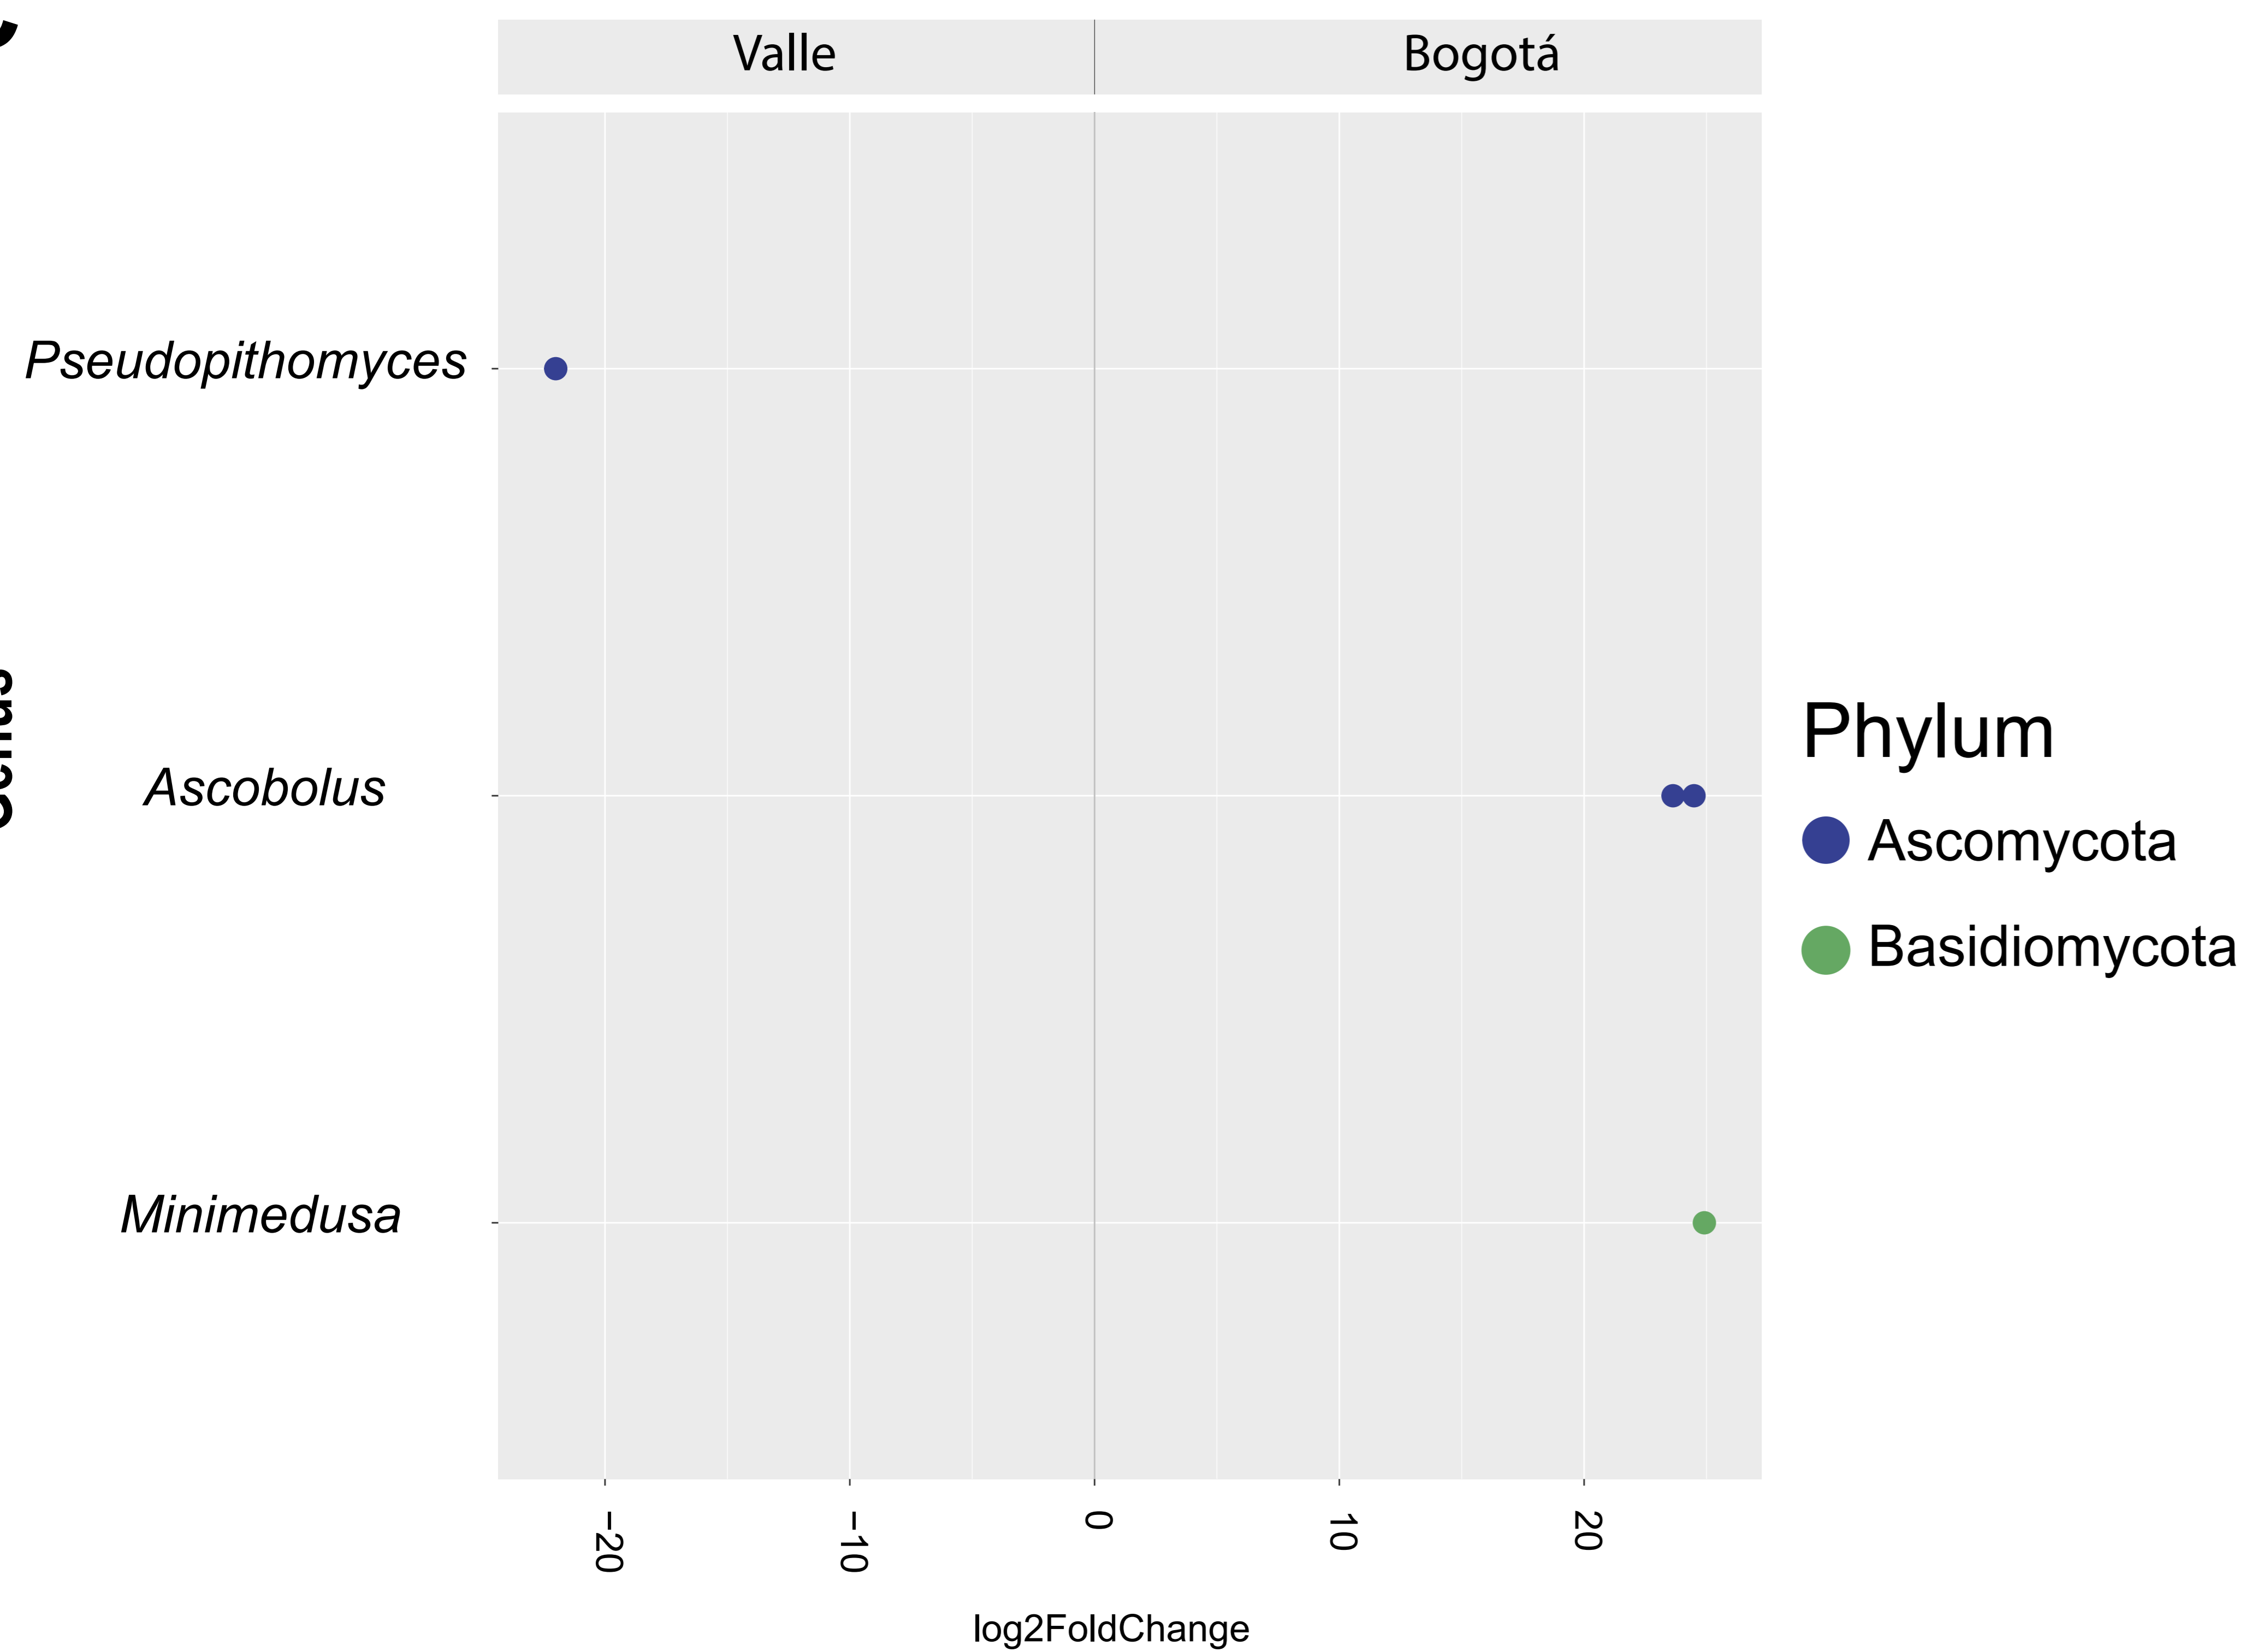**D****Genus**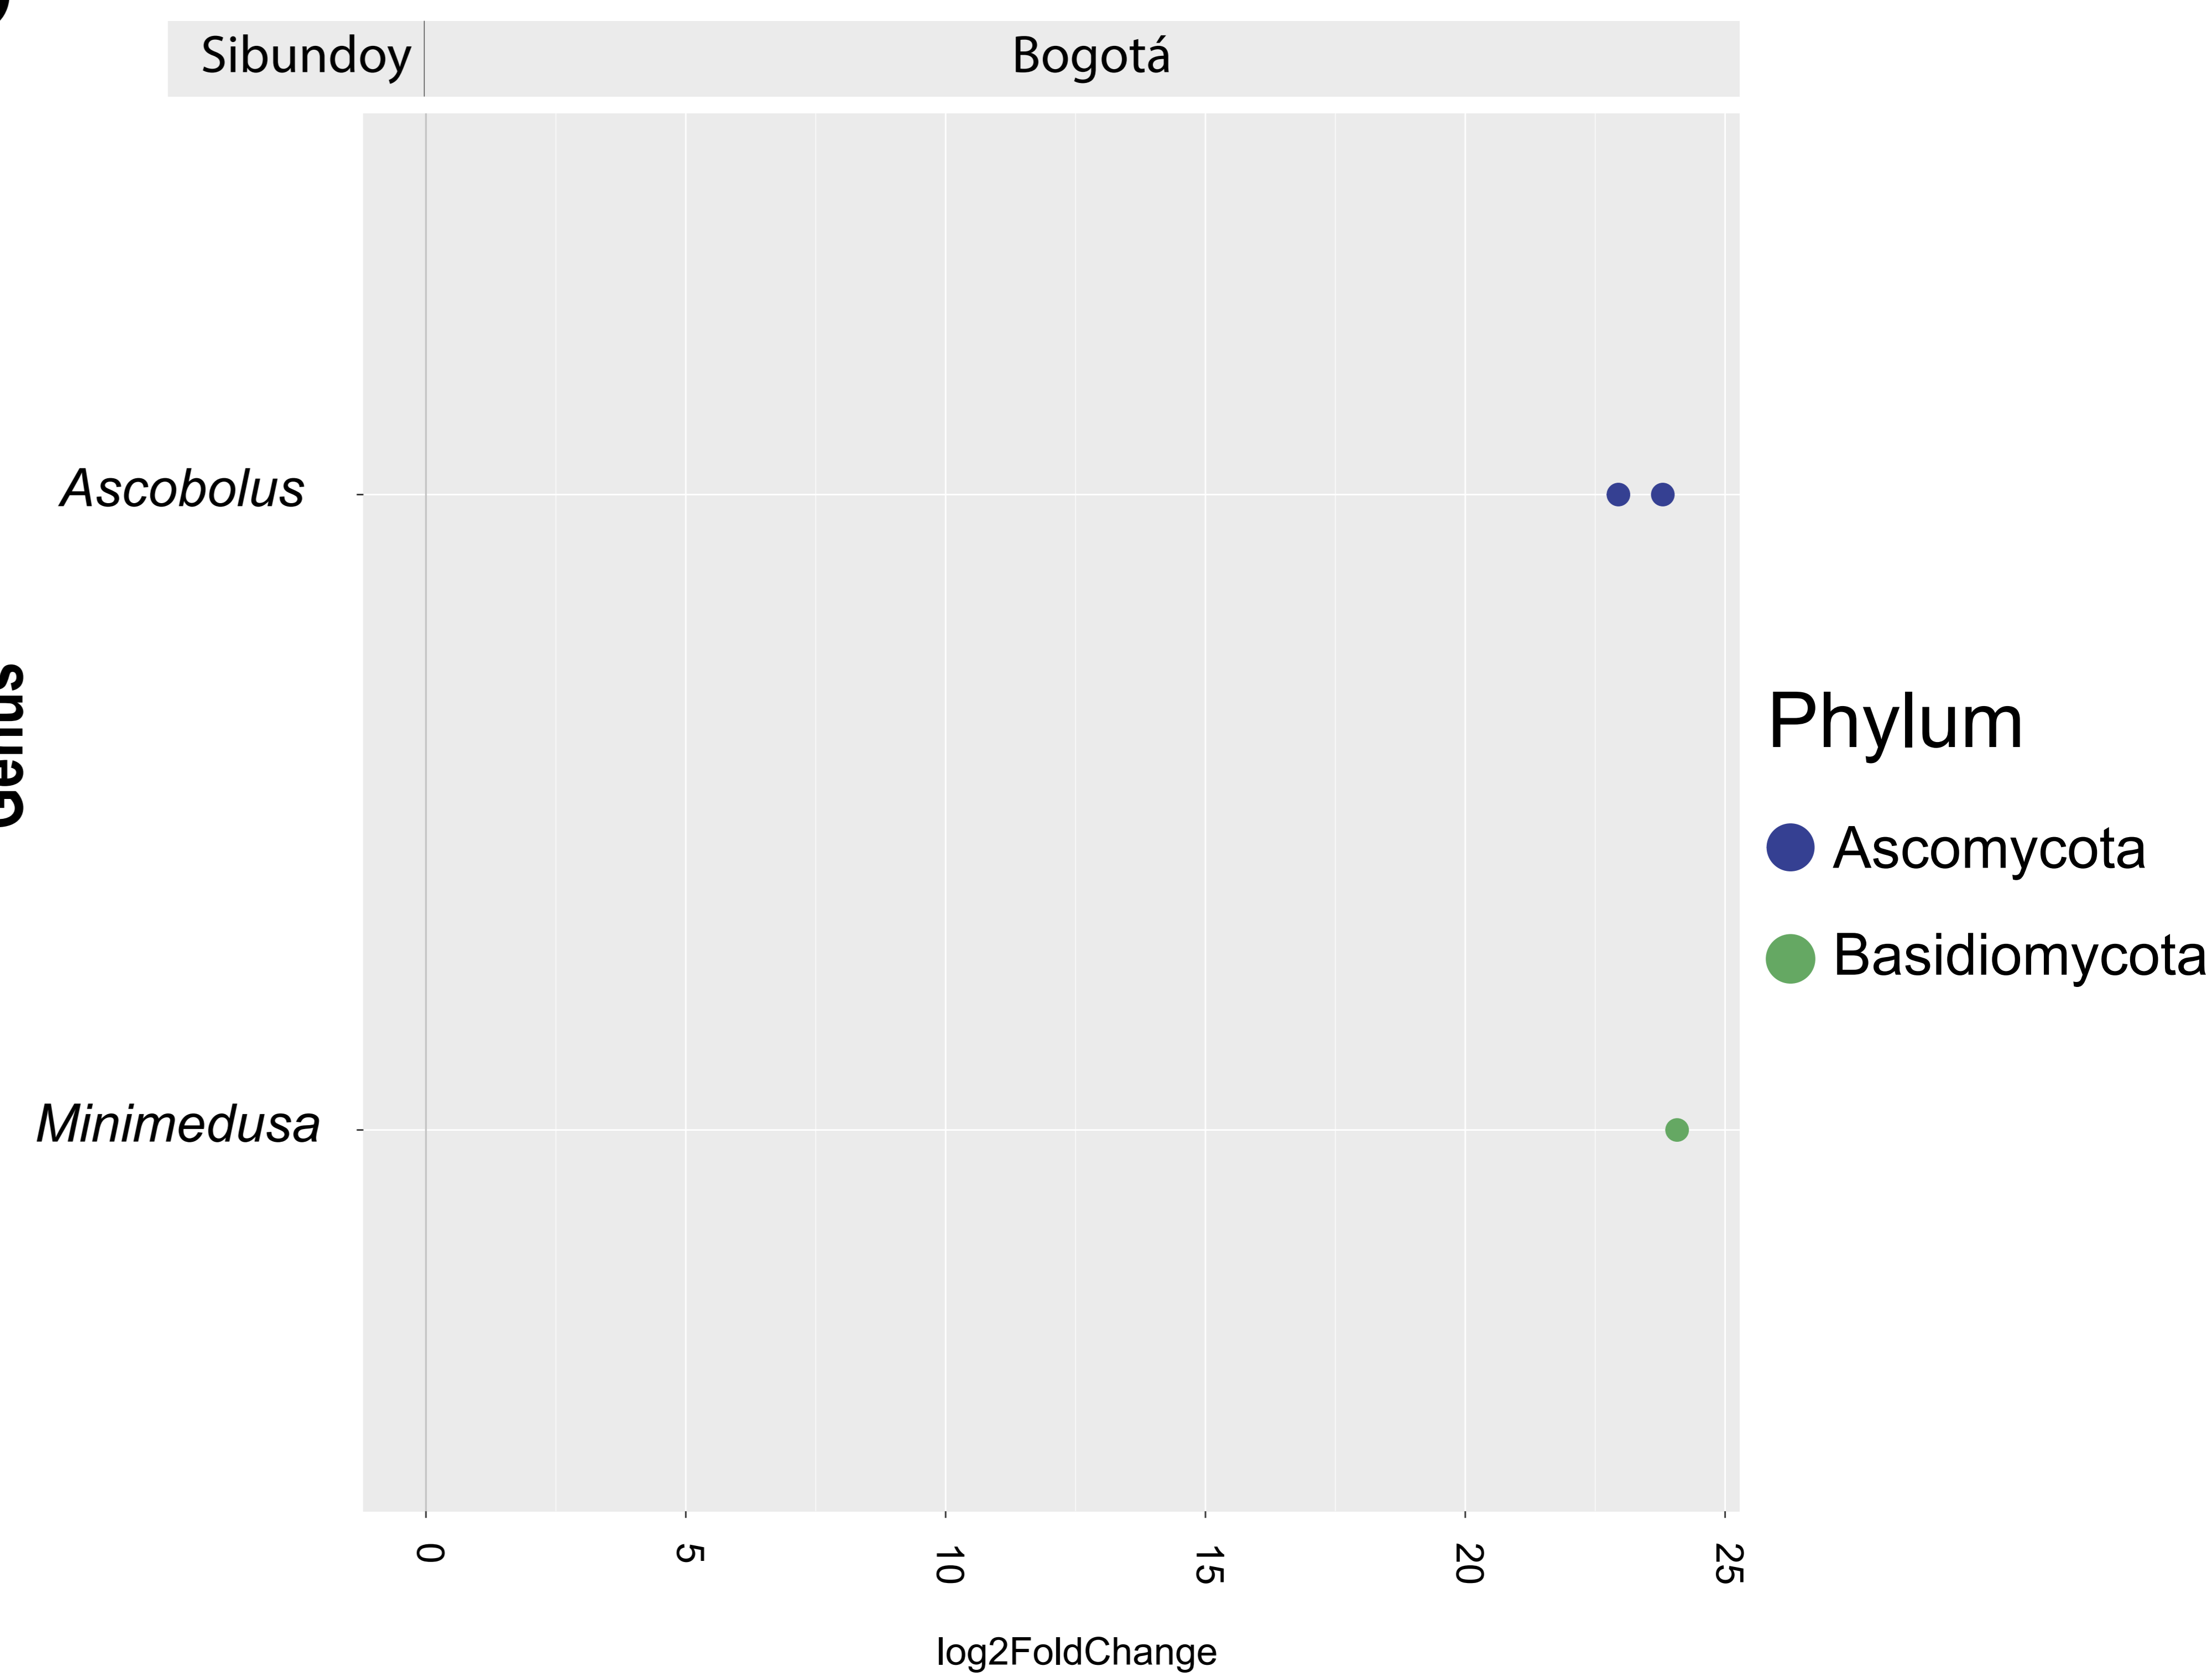

Supplement: s1 [file s1]
